# Supplementary material for: Resolving Conflicts between Agriculture and the Natural Environment
Source: PLoS Biol. 2015 Sep 9;13(9):e1002242. doi: 10.1371/journal.pbio.1002242 (PMC4564228; doi:10.1371/journal.pbio.1002242)
Supplement: S1 Data — (XLSX) [file pbio.1002242.s001.xlsx]

## Sheet: Fig1
# dataset accompanying Tanentzap et al. Resolving Conflicts between Agriculture and the Natural Environment
# compiled by AJ Tanentzap (ajt65@cam.ac.uk) 14 Mar 2015, please cite paper if re-used
# Values represent investment in different agriculture policies by select countries from 1999-2013; data used to generate Fig. 1 in main text, see Text S1 for full methods
# SOURCE = data source, either Oanda (http://www.oanda.com/currency/average), OECD PSE/CSE database (http://www.oecd.org/tad/agricultural-policies/producerandconsumersupportestimatesdatabase.htm), or WTO notifications (http://agims.wto.org/)
# AES_PROGRAMME = description of programme classified as agri-environmental; PS_PROGRAMME = description of producer support programme (DS:2-4 refer to domestic support notifications made to WTO, "Green Box" refers to DS:1)
# CURRENCY = currency in which values are reported in format [X.YYY], where X. if present denotes thousands (T), millions (M), billions (B), and YYY is standard three letter currency code (http://en.wikipedia.org/wiki/ISO_4217)
# XERATE = mean of annual bid/ask exchange rate from local currency into 1 USD, accounts for currencies expressed in T, M, B and provided only for most recent year of both sources
# VOP = value of production; AES = investment in agri-environmental schemes
# PS = investment in producer support schemes not associated with AES; PSE = producer support estimate from OECD database (unlike PS metric includes AES)
# for Argentina, WTO estimates only include aviar, bovina, porcina, leche (excludes everything for tabac); for India, WTO estimates include only wheat and rice
Country	Metric	SOURCE	AES_PROGRAMME	PS_PROGRAMME	CURRENCY	1999	2000	2001	2002	2003	2004	2005	2006	2007	2008	2009	2010	2011	2012	2013
Albania	XERATE	Oanda	NA	NA	T.LEK	NA	NA	NA	NA	NA	NA	NA	NA	NA	NA	NA	9.61523	NA	NA	NA
Albania	AES	WTO	NA	NA	T.LEK	NA	NA	NA	NA	NA	NA	NA	NA	NA	NA	NA	0	NA	NA	NA
Albania	PS	WTO	NA	DS:4	T.LEK	NA	NA	NA	NA	NA	NA	NA	NA	NA	NA	NA	985476	NA	NA	NA
Albania	PS	WTO	NA	Green box (f) payments for relief from disasters	T.LEK	NA	NA	NA	NA	NA	NA	NA	NA	NA	NA	NA	49415	NA	NA	NA
Albania	VOP	WTO	NA	NA	T.LEK	NA	NA	NA	NA	NA	NA	NA	NA	NA	NA	NA	171066000	NA	NA	NA
Argentina	XERATE	Oanda	NA	NA	ARS	NA	NA	NA	NA	NA	NA	NA	NA	NA	0.31635	NA	NA	NA	NA	NA
Argentina	AES	WTO	NA	NA	ARS	NA	NA	NA	NA	NA	NA	NA	NA	NA	0	NA	NA	NA	NA	NA
Argentina	PS	WTO	NA	DS:4	ARS	NA	NA	NA	NA	NA	NA	NA	NA	NA	7390070	NA	NA	NA	NA	NA
Argentina	PS	WTO	NA	Green box: Decoupled income support from Agricultural Social Programme	ARS	NA	NA	NA	NA	NA	NA	NA	NA	NA	6383744	NA	NA	NA	NA	NA
Argentina	PS	WTO	NA	Green box: Natural disaster relief payments	ARS	NA	NA	NA	NA	NA	NA	NA	NA	NA	76359357	NA	NA	NA	NA	NA
Argentina	PS	WTO	NA	Green box: Investment aid	ARS	NA	NA	NA	NA	NA	NA	NA	NA	NA	14469490	NA	NA	NA	NA	NA
Argentina	VOP	WTO	NA	NA	ARS	NA	NA	NA	NA	NA	NA	NA	NA	NA	9411472556	NA	NA	NA	NA	NA
Armenia	XERATE	Oanda	NA	NA	M.AMD	NA	NA	NA	NA	NA	NA	NA	NA	NA	NA	NA	NA	2685.78	NA	NA
Armenia	AES	WTO	NA	Green box: General services, vaccination of animals	M.AMD	NA	NA	NA	NA	NA	NA	NA	NA	NA	NA	NA	NA	0	NA	NA
Armenia	PS	WTO	NA	DS:4	M.AMD	NA	NA	NA	NA	NA	NA	NA	NA	NA	NA	NA	NA	370.7	NA	NA
Armenia	PS	WTO	NA	Green box: Investment aid	M.AMD	NA	NA	NA	NA	NA	NA	NA	NA	NA	NA	NA	NA	511.1	NA	NA
Armenia	VOP	WTO	NA	NA	M.AMD	NA	NA	NA	NA	NA	NA	NA	NA	NA	NA	NA	NA	825200	NA	NA
Australia	XERATE	Oanda	NA	NA	M.AUD	NA	NA	NA	NA	NA	NA	NA	NA	NA	NA	NA	917217	NA	NA	964823
Australia	AES	OECD	Water for the Future	NA	M.AUD	0	0	0	0	0	0	0	0	0	0	0	62.006	139.25	164.352	164.352
Australia	AES	OECD	National Weeds Strategy including Defeating the Weed Menace Program	NA	M.AUD	12.8	0	0	0	0	5.655	13.41	13.615	13.215	3.146	1.69	1.69	1.93	1.9	1.9
Australia	AES	OECD	Carbon Farming Initiative	NA	M.AUD	0	0	0	0	0	0	0	0	0	0	0	0	1.984	1.814	0
Australia	AES	OECD	Murray-Darling Basin Small Block Irrigator Exit Grant Package - Irrigation Management Grants	NA	M.AUD	0	0	0	0	0	0	0	0	144.403	59.502	0	0.8	0	0	0
Australia	AES	OECD	Environmental programs	NA	M.AUD	131.2	129.32	127.3	68.24	11.66	52.6689	75.96	54.13	64.84	86.71	92.92	113.86	155.25	26.44	26.44
Australia	AES	OECD	Bush Tender (Victoria)	NA	M.AUD	0	0	0	0	0	0	0	0	0	0	0	0	7.03	0.49	0.49
Australia	AES	OECD	Biodiversity Fund (environmental program)	NA	M.AUD	0	0	0	0	0	0	0	0	0	0	0	0	16.1	8	8
Australia	PSE	OECD	NA	NA	M.AUD	1211.24	1346.75	1447.36	1714.49	1422.82	1284.84	1461.79	1694.82	2223.31	1943.99	1267.57	1410.02	1542.41	971.036	995.634
Australia	VOP	OECD	NA	NA	M.AUD	30775.5	34779.3	39906.4	33235	37370.7	36537.3	38696	36663	43752	41964	39697	46981.1	48049.1	47892.2	50896.1
Australia	AES	WTO	Funding for projects to improve environmental assets, environmental management and encourage sustainable farming.	NA	M.AUD	NA	NA	NA	NA	NA	NA	NA	NA	NA	NA	NA	241.46	NA	NA	NA
Australia	AES	WTO	Funding for land managers for the purposes of managing and conserving high value environmental assets on their land.	NA	M.AUD	NA	NA	NA	NA	NA	NA	NA	NA	NA	NA	NA	11.85	NA	NA	NA
Australia	AES	WTO	Funding for projects to improve environmental management and sustainable farming.	NA	M.AUD	NA	NA	NA	NA	NA	NA	NA	NA	NA	NA	NA	0.32	NA	NA	NA
Australia	AES	WTO	Funding to identify land resources and to evaluate their opportunities and constraints to ensure appropriate land management practices which conserve, enhance, and where appropriate, rehabilitate land resources and to promote and support community Landcare.	NA	M.AUD	NA	NA	NA	NA	NA	NA	NA	NA	NA	NA	NA	19.02	NA	NA	NA
Australia	AES	WTO	Program to encourage landowners to improve land management practices, restore degraded waterways and control gully and hillslope erosion. Funding ceased as at 30 June 2011.	NA	M.AUD	NA	NA	NA	NA	NA	NA	NA	NA	NA	NA	NA	1.91	NA	NA	NA
Australia	AES	WTO	Provision of services to agricultural producers covering policy and regulatory frameworks to ensure equitable and sustainable provision of surface and groundwater resources and to limit environmental damage and to encourage sound practices to minimise soil erosion, salination and water damage.	NA	M.AUD	NA	NA	NA	NA	NA	NA	NA	NA	NA	NA	NA	7.73	NA	NA	NA
Australia	AES	WTO	This program aims to improve the management of native vegetation on private land. Landholders competitively tender for contracts to better protect and improve their native vegetation.	NA	M.AUD	NA	NA	NA	NA	NA	NA	NA	NA	NA	NA	NA	7.03	NA	NA	NA
Australia	PS	WTO	NA	DS:4	M.AUD	NA	NA	NA	NA	NA	NA	NA	NA	NA	NA	NA	84.29	NA	NA	NA
Australia	PS	WTO	NA	Assistance with direct costs of emergency animal and plant pest responses.	M.AUD	NA	NA	NA	NA	NA	NA	NA	NA	NA	NA	NA	12.7	NA	NA	NA
Australia	PS	WTO	NA	Enhanced preparedness to respond to emergency animal disease incidents, including training and development of disease control strategies.	M.AUD	NA	NA	NA	NA	NA	NA	NA	NA	NA	NA	NA	0.57	NA	NA	NA
Australia	PS	WTO	NA	To reduce the damage caused to agriculture and the environment by feral animals through: improving the effectiveness of techniques used in their control; publishing best practice management guidelines; encouraging the adoption of best practice management strategies; monitoring Rabbit Calicivirus Disease to encourage its effective use in integrated rabbit control programs and funding programs in l…	M.AUD	NA	NA	NA	NA	NA	NA	NA	NA	NA	NA	NA	0.7	NA	NA	NA
Australia	PS	WTO	NA	A technical and financial program that contributes to preparedness to deal with an outbreak of exotic animal disease by developing practical field strategies to eradicate and control wild animals. Coordination of surveillance, research and training and communications.	M.AUD	NA	NA	NA	NA	NA	NA	NA	NA	NA	NA	NA	0.57	NA	NA	NA
Australia	PS	WTO	NA	Assistance to engage in operations designed to combat outbreaks or potential outbreaks of the plague locust, the spur-throated locust and the migratory locust which are likely to result in damage to rural industries.	M.AUD	NA	NA	NA	NA	NA	NA	NA	NA	NA	NA	NA	4.61	NA	NA	NA
Australia	PS	WTO	NA	Assistance to establish a nationally integrated system for livestock traceability as a management tool to deal with animal disease emergencies and food safety issues for the red meat industry.	M.AUD	NA	NA	NA	NA	NA	NA	NA	NA	NA	NA	NA	0.17	NA	NA	NA
Australia	PS	WTO	NA	Activities aimed at reducing the establishment and spread of Siam Weed from pastures, forests and roadsides.	M.AUD	NA	NA	NA	NA	NA	NA	NA	NA	NA	NA	NA	1.32	NA	NA	NA
Australia	PS	WTO	NA	Program to eradicate four types of tropical weeds.	M.AUD	NA	NA	NA	NA	NA	NA	NA	NA	NA	NA	NA	0.7	NA	NA	NA
Australia	PS	WTO	NA	Activities aimed at eradicating Branched Broomrape weed.	M.AUD	NA	NA	NA	NA	NA	NA	NA	NA	NA	NA	NA	2.53	NA	NA	NA
Australia	PS	WTO	NA	This program helps primary producers, fishing enterprises and small rural businesses in rural areas who are experiencing financial hardship and have no other source of financial advice.	M.AUD	NA	NA	NA	NA	NA	NA	NA	NA	NA	NA	NA	12.843	NA	NA	NA
Australia	PS	WTO	NA	The program aims to improve the adoption of risk management and business management skills, increase the adoption of new technologies and best practice management to enable primary producers and industries to adapt and respond to the impacts of climate change to reduce the impact on the environment.	M.AUD	NA	NA	NA	NA	NA	NA	NA	NA	NA	NA	NA	7.59	NA	NA	NA
Australia	PS	WTO	NA	Professional advice and planning assistance to assist farmers develop business viability assessments.	M.AUD	NA	NA	NA	NA	NA	NA	NA	NA	NA	NA	NA	7.11	NA	NA	NA
Australia	PS	WTO	NA	Funding for primary producers to access specialised advice across a range of areas to assist them to adjust to the impacts of climate change.	M.AUD	NA	NA	NA	NA	NA	NA	NA	NA	NA	NA	NA	1.32	NA	NA	NA
Australia	PS	WTO	NA	Bore capping and related activities to eliminate wastage of water and manage the artesian water resource, thereby preserving options for the future.	M.AUD	NA	NA	NA	NA	NA	NA	NA	NA	NA	NA	NA	1.32	NA	NA	NA
Australia	PS	WTO	NA	To support the development of a sustainable and efficient irrigation industry in Tasmania.	M.AUD	NA	NA	NA	NA	NA	NA	NA	NA	NA	NA	NA	3.19	NA	NA	NA
Australia	PS	WTO	NA	The program is targeted at improving the efficiency and productivity of on-farm water use and management in the Lachlan and southern-connected Murray Darling Basin, acquire unencumbered water entitlements for the Commonwealth, and to assist communities to adjust to a future with less water.	M.AUD	NA	NA	NA	NA	NA	NA	NA	NA	NA	NA	NA	60.33	NA	NA	NA
Australia	PS	WTO	NA	Control of feral animals (pigs, foxes, rabbits, dogs) and declared pest plants	M.AUD	NA	NA	NA	NA	NA	NA	NA	NA	NA	NA	NA	0.32	NA	NA	NA
Australia	PS	WTO	NA	Provision of resources to ensure that disease and pest risks of particular relevance to agricultural production are minimised.	M.AUD	NA	NA	NA	NA	NA	NA	NA	NA	NA	NA	NA	50.88	NA	NA	NA
Australia	PS	WTO	NA	Control of feral animals and pests (such as wild horses, donkeys and wild pigs) and to contain and eradicate noxious weeds.	M.AUD	NA	NA	NA	NA	NA	NA	NA	NA	NA	NA	NA	2.99	NA	NA	NA
Australia	PS	WTO	NA	Pest and disease surveillance, control of exotic pests and diseases and manage the response for emerging animal and plant diseases.	M.AUD	NA	NA	NA	NA	NA	NA	NA	NA	NA	NA	NA	4.83	NA	NA	NA
Australia	PS	WTO	NA	Programs for the eradication and control of pests and diseases impacting on the agricultural sector.	M.AUD	NA	NA	NA	NA	NA	NA	NA	NA	NA	NA	NA	5.83	NA	NA	NA
Australia	PS	WTO	NA	To minimise the economic, environmental and social impacts caused by rabbits by encouraging farmers to implement integrated rabbit control programs, particularly those that maximise the gains from the introduction of the Rabbit Calicivirus.	M.AUD	NA	NA	NA	NA	NA	NA	NA	NA	NA	NA	NA	1.66	NA	NA	NA
Australia	PS	WTO	NA	Advisory services to minimise the economic, environmental and social impact on all land in Victoria of actual and potential animal pests (rabbits included).	M.AUD	NA	NA	NA	NA	NA	NA	NA	NA	NA	NA	NA	9.93	NA	NA	NA
Australia	PS	WTO	NA	Research and advisory services for the effective management of identified pest plants.	M.AUD	NA	NA	NA	NA	NA	NA	NA	NA	NA	NA	NA	14.54	NA	NA	NA
Australia	PS	WTO	NA	The Victorian Government established a number of locust Incident Management Teams (IMTs). The IMTs carried out a number of roles including field operations (e.g. undertaking ground and air surveillance, mapping and ground sprayers) and community engagement activities (e.g. advising private landholders when and where locust banding was observed on private land).	M.AUD	NA	NA	NA	NA	NA	NA	NA	NA	NA	NA	NA	20.03	NA	NA	NA
Australia	PS	WTO	NA	Funding for emergency responses to pest & disease outbreaks.	M.AUD	NA	NA	NA	NA	NA	NA	NA	NA	NA	NA	NA	14.34	NA	NA	NA
Australia	PS	WTO	NA	Activities aimed at eradicating Branched Broomrape weed.	M.AUD	NA	NA	NA	NA	NA	NA	NA	NA	NA	NA	NA	1.32	NA	NA	NA
Australia	PS	WTO	NA	Miscellaneous pest and disease control, including feral camel management and control of feral pest foxes, dingoes and rabbits.	M.AUD	NA	NA	NA	NA	NA	NA	NA	NA	NA	NA	NA	0.55	NA	NA	NA
Australia	PS	WTO	NA	Pest and disease control for Western Australian agricultural industries.	M.AUD	NA	NA	NA	NA	NA	NA	NA	NA	NA	NA	NA	9.9	NA	NA	NA
Australia	PS	WTO	NA	Farm management, productivity enhancement and sustainability training for agricultural producers.	M.AUD	NA	NA	NA	NA	NA	NA	NA	NA	NA	NA	NA	8.61	NA	NA	NA
Australia	PS	WTO	NA	Training support for sustainable rural management, trade and market development.	M.AUD	NA	NA	NA	NA	NA	NA	NA	NA	NA	NA	NA	9.31	NA	NA	NA
Australia	PS	WTO	NA	Provision of advisory and extension services to agricultural producers.	M.AUD	NA	NA	NA	NA	NA	NA	NA	NA	NA	NA	NA	0.07	NA	NA	NA
Australia	PS	WTO	NA	Provision of advisory and extension services to ensure that best-practice methods are adopted by the industry.	M.AUD	NA	NA	NA	NA	NA	NA	NA	NA	NA	NA	NA	25	NA	NA	NA
Australia	PS	WTO	NA	Provision of a financial counselling service to help primary producers and small rural businesses in rural areas, which are experiencing financial hardship and have no other source of financial advice.	M.AUD	NA	NA	NA	NA	NA	NA	NA	NA	NA	NA	NA	0.84	NA	NA	NA
Australia	PS	WTO	NA	To provide extension and advisory services to primary producers (excluding fisheries).	M.AUD	NA	NA	NA	NA	NA	NA	NA	NA	NA	NA	NA	2.97	NA	NA	NA
Australia	PS	WTO	NA	Provision of extension and advisory services.	M.AUD	NA	NA	NA	NA	NA	NA	NA	NA	NA	NA	NA	24.67	NA	NA	NA
Australia	PS	WTO	NA	Provision of extension activities to improve water use efficiency.	M.AUD	NA	NA	NA	NA	NA	NA	NA	NA	NA	NA	NA	0.9	NA	NA	NA
Australia	PS	WTO	NA	Provision of extension services leading towards the adoption of better water management/effluent management practices.	M.AUD	NA	NA	NA	NA	NA	NA	NA	NA	NA	NA	NA	1.11	NA	NA	NA
Australia	PS	WTO	NA	Provision of extension advice to enhance sustainable economic development.	M.AUD	NA	NA	NA	NA	NA	NA	NA	NA	NA	NA	NA	1.51	NA	NA	NA
Australia	PS	WTO	NA	Provision of financial counselling advice to farming businesses experiencing financial hardship.	M.AUD	NA	NA	NA	NA	NA	NA	NA	NA	NA	NA	NA	0.2	NA	NA	NA
Australia	PS	WTO	NA	Provision of advice concerning farm management, finance and general agriculture and the dissemination of results from research programs.	M.AUD	NA	NA	NA	NA	NA	NA	NA	NA	NA	NA	NA	1.43	NA	NA	NA
Australia	PS	WTO	NA	Provision of extension and advisory services to agricultural producers.	M.AUD	NA	NA	NA	NA	NA	NA	NA	NA	NA	NA	NA	14.44	NA	NA	NA
Australia	PS	WTO	NA	Provision of a financial counselling service to help primary producers, fishing enterprises and small rural businesses in rural areas that are experiencing financial hardship and have no other source of financial advice.	M.AUD	NA	NA	NA	NA	NA	NA	NA	NA	NA	NA	NA	0.57	NA	NA	NA
Australia	PS	WTO	NA	Provision of extension and advisory services to agricultural producers.	M.AUD	NA	NA	NA	NA	NA	NA	NA	NA	NA	NA	NA	21.15	NA	NA	NA
Australia	PS	WTO	NA	Provision of a financial counselling service to help primary producers, fishing enterprises and small rural businesses in rural areas, which are experiencing financial hardship and have no other source of financial advice.	M.AUD	NA	NA	NA	NA	NA	NA	NA	NA	NA	NA	NA	0.11	NA	NA	NA
Australia	PS	WTO	NA	To enhance land and water resource management on pastoral properties by encouraging sound planning of watering facilities.	M.AUD	NA	NA	NA	NA	NA	NA	NA	NA	NA	NA	NA	0.08	NA	NA	NA
Australia	PS	WTO	NA	Upper South East drainage and dry land salinity management program.	M.AUD	NA	NA	NA	NA	NA	NA	NA	NA	NA	NA	NA	7.43	NA	NA	NA
Australia	PS	WTO	NA	Assistance in the provision of rural infrastructure and associated services to ensure the continued development of efficient and sustainable agriculture.	M.AUD	NA	NA	NA	NA	NA	NA	NA	NA	NA	NA	NA	27.67	NA	NA	NA
Australia	PS	WTO	NA	The FMD scheme is a tax-linked, financial risk management measure delivered commercially through participating financial institutions. The scheme allows taxable, primary production income from profitable years to be set aside for subsequent 'drawn-down' in low-income years; thereby reducing the risk to primary producers of income variability due to factors such as drought.	M.AUD	NA	NA	NA	NA	NA	NA	NA	NA	NA	NA	NA	30	NA	NA	NA
Australia	PS	WTO	NA	Support for farmers whose farm business incomes have been adversely affected by exceptional circumstances (such as extreme and prolonged drought).	M.AUD	NA	NA	NA	NA	NA	NA	NA	NA	NA	NA	NA	247.51	NA	NA	NA
Australia	PS	WTO	NA	Assists farm families in exceptional circumstances declared areas (eg extreme and prolonged drought) to meet basic living expenses by providing sufficient immediate cash, equivalent to unemployment benefits and triggers access to auxiliary benefits such as access to basic health care.	M.AUD	NA	NA	NA	NA	NA	NA	NA	NA	NA	NA	NA	146.01	NA	NA	NA
Australia	PS	WTO	NA	Interest rate subsidies to assist farm businesses in drought declared areas.	M.AUD	NA	NA	NA	NA	NA	NA	NA	NA	NA	NA	NA	0.12	NA	NA	NA
Australia	PS	WTO	NA	Support to farm families and farm businesses to mitigate the effects of drought, floods, bushfires, storms and earthquakes.	M.AUD	NA	NA	NA	NA	NA	NA	NA	NA	NA	NA	NA	37	NA	NA	NA
Australia	PS	WTO	NA	Interest rate subsidies to assist farm businesses in drought declared areas.	M.AUD	NA	NA	NA	NA	NA	NA	NA	NA	NA	NA	NA	17.96	NA	NA	NA
Australia	PS	WTO	NA	Interest subsidies to assist with drought conditions in drought declared areas.	M.AUD	NA	NA	NA	NA	NA	NA	NA	NA	NA	NA	NA	1.61	NA	NA	NA
Australia	PS	WTO	NA	Assistance for primary producers who suffered direct damage from flooding.	M.AUD	NA	NA	NA	NA	NA	NA	NA	NA	NA	NA	NA	99	NA	NA	NA
Australia	PS	WTO	NA	Interest rate subsidies to assist farm businesses in drought declared areas.	M.AUD	NA	NA	NA	NA	NA	NA	NA	NA	NA	NA	NA	2.25	NA	NA	NA
Australia	PS	WTO	NA	Assistance for farming businesses affected by drought to prepare and implement business plans.	M.AUD	NA	NA	NA	NA	NA	NA	NA	NA	NA	NA	NA	2.48	NA	NA	NA
Australia	PS	WTO	NA	Concessional loans to farm businesses who suffered losses as a result of bushfires (funded 90% Cth 10% State less administration).	M.AUD	NA	NA	NA	NA	NA	NA	NA	NA	NA	NA	NA	0.01	NA	NA	NA
Australia	PS	WTO	NA	Interest rate subsidies to assist farm businesses in drought declared areas.	M.AUD	NA	NA	NA	NA	NA	NA	NA	NA	NA	NA	NA	4.8	NA	NA	NA
Australia	PS	WTO	NA	Short term interest rate subsidies for farm businesses affected by drought.	M.AUD	NA	NA	NA	NA	NA	NA	NA	NA	NA	NA	NA	2.65	NA	NA	NA
Australia	PS	WTO	NA	The exit package assists primary producers in Exceptional Circumstances (EC) declared areas who have been severely affected by drought, to exit farming, ensuring that there is sufficient financial support available to enable re-establishment outside farming.	M.AUD	NA	NA	NA	NA	NA	NA	NA	NA	NA	NA	NA	23.43	NA	NA	NA
Australia	VOP	WTO	NA	NA	M.AUD	NA	NA	NA	NA	NA	NA	NA	NA	NA	NA	NA	48674	NA	NA	NA
Brazil	XERATE	Oanda	NA	NA	M.BRL	NA	NA	NA	NA	NA	NA	NA	NA	NA	NA	NA	NA	NA	511889	NA
Brazil	XERATE	Oanda	NA	NA	T.USD	NA	NA	NA	NA	NA	NA	NA	NA	NA	NA	NA	NA	NA	1000	NA
Brazil	AES	OECD	NA	NA	M.BRL	0	0	0	0	0	0	0	0	0	0	0	0	0	0	NA
Brazil	VOP	OECD	NA	NA	M.BRL	74397.5	84651.3	98255.6	126262	166987	184861	179140	175073	209733	256201	260819	275811	337649	370387	NA
Brazil	PSE	OECD	NA	NA	M.BRL	-5904.73	5018.66	4382.09	6184.87	9766.72	7948.9	12555.2	11265.3	10289.4	9826.99	17250.6	12670.3	16711.9	17578.7	NA
Brazil	AES	WTO	NA	NA	T.USD	NA	NA	NA	NA	NA	NA	NA	NA	NA	NA	NA	NA	NA	0	NA
Brazil	PS	WTO	NA	DS:4	T.USD	NA	NA	NA	NA	NA	NA	NA	NA	NA	NA	NA	NA	NA	2.60858e+06	NA
Brazil	PS	WTO	NA	DS:2	T.USD	NA	NA	NA	NA	NA	NA	NA	NA	NA	NA	NA	NA	NA	1.03974e+06	NA
Brazil	PS	WTO	NA	Green box: 4) GOVERNMENT AGRICULTURAL INSURANCE PROGRAMME	T.USD	NA	NA	NA	NA	NA	NA	NA	NA	NA	NA	NA	NA	NA	301906	NA
Brazil	PS	WTO	NA	Green box: 1ii) Budgetary expenditures, financed by public resources, in activities related to animal and plant health services, zoosanitary and phytosanitary defense and alertness, inspection and disease control, training programmes related to disease control and prevention, warning services	T.USD	NA	NA	NA	NA	NA	NA	NA	NA	NA	NA	NA	NA	NA	49787.8	NA
Brazil	PS	WTO	NA	Green box: 1iv) Extension services on agricultural production	T.USD	NA	NA	NA	NA	NA	NA	NA	NA	NA	NA	NA	NA	NA	35546.5	NA
Brazil	PS	WTO	NA	Green box: 1iv) Extension services on rural development	T.USD	NA	NA	NA	NA	NA	NA	NA	NA	NA	NA	NA	NA	NA	189880	NA
Brazil	PS	WTO	NA	Green box: 1iv) Extension services on sustainability and competitiveness	T.USD	NA	NA	NA	NA	NA	NA	NA	NA	NA	NA	NA	NA	NA	1055.3	NA
Brazil	PS	WTO	NA	Green box: 1iv) Support for projects of agricultural development	T.USD	NA	NA	NA	NA	NA	NA	NA	NA	NA	NA	NA	NA	NA	278707	NA
Brazil	PS	WTO	NA	Green box: 1iv) Support for technological innovation projects to family farming	T.USD	NA	NA	NA	NA	NA	NA	NA	NA	NA	NA	NA	NA	NA	112689	NA
Brazil	VOP	WTO	NA	NA	T.USD	NA	NA	NA	NA	NA	NA	NA	NA	NA	NA	NA	NA	NA	1.00762e+08	NA
Canada	XERATE	Oanda	NA	NA	M.CAD	NA	NA	NA	NA	NA	NA	NA	NA	NA	NA	NA	NA	1.01104e+06	NA	970878
Canada	AES	OECD	PEI Hog Transition Program	NA	M.CAD	0	0	0	0	0	0	0	0	0	2.44108	1.8956	0	0	0	0
Canada	AES	OECD	Greencover Canada - Land Conversion	NA	M.CAD	0	0	0	0	1.84244	3.51743	4.2523	6.97595	9.73835	0	0	0	0	0	0
Canada	AES	OECD	National Farm Stewardship Program	NA	M.CAD	0	0	0	0	0	5.13216	14.8248	48.9117	103.953	22.1609	0	0	0	0	0
Canada	AES	OECD	Tobacco Adjustment Programs	NA	M.CAD	0	0	0	0	0	38.696	71.367	4.71526	0	0	0	0	0	0	0
Canada	AES	OECD	Tobacco Transition Program	NA	M.CAD	0	0	0	0	0	0	0	0	0	0	284.88	0	0	0	0
Canada	AES	OECD	Hog Farm Transition Program	NA	M.CAD	0	0	0	0	0	0	0	0	0	0	0	57.0177	14.6852	0	0
Canada	PSE	OECD	NA	NA	M.CAD	5260.2	6487.68	5604.19	7458.88	8285.67	7241.87	7705.04	7517.04	6751.54	6184.19	7646.25	7282.4	7434.73	7795.26	6209.79
Canada	VOP	OECD	NA	NA	M.CAD	27927.7	30002.8	32761.2	32383.8	29401.5	31461	31747.7	32626.5	37144.9	42408.7	41117.6	41050.1	46900.3	50893	51653.2
Canada	AES	WTO	Green box: h) Hog Farm Transition Program notified under G/AG/N/CAN/91	NA	M.CAD	NA	NA	NA	NA	NA	NA	NA	NA	NA	NA	NA	NA	14.7	NA	NA
Canada	AES	WTO	Green box: j) consists of Growing Forward Framework initiatives (environmental programs) notified under G/AG/N/CAN/91	NA	M.CAD	NA	NA	NA	NA	NA	NA	NA	NA	NA	NA	NA	NA	64.2	NA	NA
Canada	AES	WTO	Green box: j) mainly management of soil, water and manure in Quebec, but also includes expenditures notified under G/AG/N/CAN/38, 44, 50, and 64	NA	M.CAD	NA	NA	NA	NA	NA	NA	NA	NA	NA	NA	NA	NA	22.5	NA	NA
Canada	AES	WTO	Green box: k) Pilot Programme to Support Multifunctionality of Agriculture (Quebec)	NA	M.CAD	NA	NA	NA	NA	NA	NA	NA	NA	NA	NA	NA	NA	0.7	NA	NA
Canada	PS	WTO	NA	DS:4	M.CAD	NA	NA	NA	NA	NA	NA	NA	NA	NA	NA	NA	NA	3067.9	NA	NA
Canada	PS	WTO	NA	Green Box: aiv) mainly extension programs, including extension-related expenditures notified under G/AG/N/CAN/29, 44, 50, 54, and 61	M.CAD	NA	NA	NA	NA	NA	NA	NA	NA	NA	NA	NA	NA	181.8	NA	NA
Canada	PS	WTO	NA	Green Box: k) Growing Forward Framework initiatives notified under G/AG/N/CAN/91 (Manitoba Northern Agriculture Initiative).	M.CAD	NA	NA	NA	NA	NA	NA	NA	NA	NA	NA	NA	NA	0.1	NA	NA
Canada	PS	WTO	NA	Green Box: i) 2010 Manitoba Individual Flood Proofing Initiative notified under G/AG/N/CAN/97	M.CAD	NA	NA	NA	NA	NA	NA	NA	NA	NA	NA	NA	NA	0.3	NA	NA
Canada	PS	WTO	NA	Green Box: e) consists of the Income Disaster Component of AgriStability notified under G/AG/N/CAN/91	M.CAD	NA	NA	NA	NA	NA	NA	NA	NA	NA	NA	NA	NA	555.3	NA	NA
Canada	PS	WTO	NA	Green Box: aiv) mainly the Canadian Agriculture Adaptation Program (formerly ACAAF notified in G/AG/N/CAN/70) and Growing Forward Framework initiatives (extension and advisory services), notified under G/AG/N/CAN/91	M.CAD	NA	NA	NA	NA	NA	NA	NA	NA	NA	NA	NA	NA	97.6	NA	NA
Canada	VOP	WTO	NA	NA	M.CAD	NA	NA	NA	NA	NA	NA	NA	NA	NA	NA	NA	NA	50545.9	NA	NA
Chile	XERATE	Oanda	NA	NA	M.CLP	NA	NA	NA	NA	NA	NA	NA	NA	NA	NA	NA	NA	NA	NA	2018.5
Chile	AES	OECD	Soil recovery programme direct payments	NA	M.CLP	14182.5	21271.2	25180.5	22814.2	22708.3	22093.6	23544.4	24732	26215.3	22079.5	29347.1	13123.8	26455.3	29251	30714.8
Chile	VOP	OECD	NA	NA	M.CLP	2.40622e+06	2.69778e+06	2.74146e+06	2.94607e+06	3.14397e+06	3.27356e+06	3515062	3622276	3965770	5333224	5139047	5449473	6401525	6.84963e+06	7.32911e+06
Chile	PSE	OECD	NA	NA	M.CLP	255979	314670	176609	282255	176919	165857	178959	157831	140363	143876	216496	145742	170959	193802	204438
Chile	AES	WTO	DS:9 Land reclamation	NA	M.CLP	NA	NA	NA	NA	NA	NA	NA	NA	NA	NA	NA	NA	NA	NA	30715
Chile	PS	WTO	NA	DS:9 Irrigation Law No. 18.450	M.CLP	NA	NA	NA	NA	NA	NA	NA	NA	NA	NA	NA	NA	NA	NA	17444
Chile	PS	WTO	NA	DS:4	M.CLP	NA	NA	NA	NA	NA	NA	NA	NA	NA	NA	NA	NA	NA	NA	48159
Chile	PS	WTO	NA	DS:2	M.CLP	NA	NA	NA	NA	NA	NA	NA	NA	NA	NA	NA	NA	NA	NA	15099.3
Chile	PS	WTO	NA	Green box: 2.5 Direct payments to producers	M.CLP	NA	NA	NA	NA	NA	NA	NA	NA	NA	NA	NA	NA	NA	NA	3873.46
Chile	PS	WTO	NA	Green box: 2.8 Disaster relief payments	M.CLP	NA	NA	NA	NA	NA	NA	NA	NA	NA	NA	NA	NA	NA	NA	2150.53
Chile	PS	WTO	NA	Green box: (g) Infrastructure services	M.CLP	NA	NA	NA	NA	NA	NA	NA	NA	NA	NA	NA	NA	NA	NA	18763.2
Chile	PS	WTO	NA	Green box: (d) Extension and advisory services	M.CLP	NA	NA	NA	NA	NA	NA	NA	NA	NA	NA	NA	NA	NA	NA	5214.83
Chile	PS	WTO	NA	Green box: (c) Training services	M.CLP	NA	NA	NA	NA	NA	NA	NA	NA	NA	NA	NA	NA	NA	NA	44381
Chile	VOP	WTO	NA	NA	M.CLP	NA	NA	NA	NA	NA	NA	NA	NA	NA	NA	NA	NA	NA	NA	7329106
China	XERATE	Oanda	NA	NA	M.CNY	NA	NA	NA	NA	NA	NA	NA	NA	NA	143858	NA	NA	NA	158438	NA
China	AES	OECD	Water-saving techniques expansion in arid area	NA	M.CNY	0	0	0	0	0	10	20	20	20	60	60	0	0	0	NA
China	AES	OECD	Payments to grassland ecological protection	NA	M.CNY	0	0	0	0	0	0	0	0	0	0	0	0	12410	12350	NA
China	AES	OECD	Returning grazing land to grassland project	NA	M.CNY	0	0	0	0	0	1120	1120	720	880	785.6	1462.8	1369	59	56.05	NA
China	AES	OECD	Grain for green programme Return Farmland to Forest Programme	NA	M.CNY	0	131.1	2412.24	8322	14421	15154.6	16547.7	15048	16476.4	20565.6	24984.8	21586	17443	17564.4	NA
China	AES	OECD	Returning farmland to grassland project	NA	M.CNY	0	0	0	0	0	0	0	0	0	0	0	0	4	3.8	NA
China	AES	OECD	Payments for grassland vegetation recovery	NA	M.CNY	0	0	0	0	0	0	0	0	0	0	0	744	568	645.839	NA
China	VOP	OECD	NA	NA	M.CNY	2110380	2126670	2242590	2338618	2440890	3031220	3292420	3.32102e+06	4078370	4862780	5007950	5143681	5638182	5893503	NA
China	PSE	OECD	NA	NA	M.CNY	-70956.2	50139.5	91221.1	178668	226235	205497	255753	425466	426005	148271	608059	826089	765694	1.04462e+06	NA
China	VOP	WTO	NA	NA	M.CNY	NA	NA	NA	NA	NA	NA	NA	NA	NA	5279877	NA	NA	NA	NA	NA
China	AES	WTO	Green box: (j) Environmental programmes	NA	M.CNY	NA	NA	NA	NA	NA	NA	NA	NA	NA	68864.1	NA	NA	NA	NA	NA
China	PS	WTO	NA	Green box: (d) Decoupled income support	M.CNY	NA	NA	NA	NA	NA	NA	NA	NA	NA	23606.7	NA	NA	NA	NA	NA
China	PS	WTO	NA	Green box: (k) Regional assistance programmes	M.CNY	NA	NA	NA	NA	NA	NA	NA	NA	NA	32034.42+55387.34	NA	NA	NA	NA	NA
China	PS	WTO	NA	Green box: (f) Payments for relief from natural disasters	M.CNY	NA	NA	NA	NA	NA	NA	NA	NA	NA	55387.3	NA	NA	NA	NA	NA
China	PS	WTO	NA	DS:4	M.CNY	NA	NA	NA	NA	NA	NA	NA	NA	NA	89104.9	NA	NA	NA	NA	NA
Costa Rica	XERATE	Oanda	NA	NA	M.USD	NA	NA	NA	NA	NA	NA	NA	NA	NA	NA	1000000	NA	NA	NA	NA
Costa Rica	AES	WTO	Payment for environmental services in agroforestry systems: This programme provides economic compensation for land‑owning farmers growing multi‑purpose forest plantations in close combination with annual or perennial crops and/or animal husbandry, as an effective means of maintaining, rehabilitating and developing forest ecosystems.	NA	M.USD	NA	NA	NA	NA	NA	NA	NA	NA	NA	NA	0.17064	NA	NA	NA	NA
Costa Rica	AES	WTO	Watershed management programme: The measure aims to develop field activities and projects in several of the country's watersheds in order to ensure sustainable use of natural, social and economic resources through an integrated and participatory approach. It consists of environmental education programmes and projects and training and advisory services for producers and includes training and exten…	NA	M.USD	NA	NA	NA	NA	NA	NA	NA	NA	NA	NA	0.35437	NA	NA	NA	NA
Costa Rica	PS	WTO	NA	DS:4	M.USD	NA	NA	NA	NA	NA	NA	NA	NA	NA	NA	91.7757	NA	NA	NA	NA
Costa Rica	PS	WTO	NA	Sustainable agricultural production promotion programme (PFPAS): Management and general administration programmes; investment and technical assistance; training, information and studies with a view to supporting competitiveness.	M.USD	NA	NA	NA	NA	NA	NA	NA	NA	NA	NA	6.81403	NA	NA	NA	NA
Costa Rica	PS	WTO	NA	Establishment of settlements: This programme covers all the procedures necessary to set up rural settlements, in order to help farming families establish themselves on the land they have bought and to provide them with legal evidence of ownership and hence right of occupancy. It also encompasses monitoring and follow‑up of agricultural activities in the settlements by the IDA.	M.USD	NA	NA	NA	NA	NA	NA	NA	NA	NA	NA	7.94516	NA	NA	NA	NA
Costa Rica	PS	WTO	NA	Programme for agro‑industrial development and modernization and greater value added: Advisory services, technical assistance and training for structured groups of small and medium‑sized agricultural and agro‑industrial producers in areas such as food technology, hygienic handling of products and food management, good manufacturing practices, hazard analysis and critical control points (HACCP), ag…	M.USD	NA	NA	NA	NA	NA	NA	NA	NA	NA	NA	0.20281	NA	NA	NA	NA
Costa Rica	VOP	WTO	NA	NA	M.USD	NA	NA	NA	NA	NA	NA	NA	NA	NA	NA	3694	NA	NA	NA	NA
EU	XERATE	Oanda	NA	NA	M.EUR	NA	NA	NA	NA	NA	NA	NA	NA	NA	NA	NA	NA	1.39108e+06	NA	1.3276e+06
EU	AES	OECD	Agri-environmental programmes RDR expenditures	NA	M.EUR	0	0	0	0	0	0	0	0	0	28.1676	0	3.05253	0	0.16548	0.150029
EU	AES	OECD	Agri-environmental programmes national expenditures	NA	M.EUR	0	0	0	0	0	0	0	0	0	31.5	0	2.592	0	0.175	0.15925
EU	AES	OECD	Annual soil improvement subsidies (liming/erosion control) national expenditures	NA	M.EUR	0	0	0	0	0	3.85279	2.16334	2.6445	3.27307	0.735557	0.410231	0.098011	0	0	0
EU	AES	OECD	Meeting standards (manure handling)	NA	M.EUR	0	0	0	0	0	27.8184	131.125	65.4055	0	0	0	0	0	0	0
EU	AES	OECD	Meeting standards (manure handling) National expenditures	NA	M.EUR	69.8856	110.315	93.0182	94.9343	80.4458	85.1143	137.218	148.323	189.703	659.298	417	375.414	134.649	128.442	100.889
EU	AES	OECD	Meeting standards (all)	NA	M.EUR	0	0	0	0	0	214.358	160.72	128.603	0	0	0	0	0	0	0
EU	AES	OECD	Meeting standards (all) National expenditures	NA	M.EUR	4.82721	3.93094	3.20723	2.24749	1.9111	14.1352	55.1881	93.0677	199.16	40.1872	26.2571	32.4851	21.8732	20.6443	6.92122
EU	AES	OECD	Environmental extension RDR expenditures	NA	M.EUR	0	0	0	0	0.641199	6.68897	2.49683	2.22996	1.58771	2.55266	2.49752	3.45423	3.97177	3.55163	3.37728
EU	AES	OECD	Environmental extension national expenditures	NA	M.EUR	0	0	0	0	0.773	8.61	2.80152	2.23068	2.41974	2.85466	2.37748	2.9331	3.84371	3.75594	3.58486
EU	AES	OECD	Payments for nitrate reduction Maize	NA	M.EUR	0.0543759	0.0887603	0.0682859	0.0351868	0.0273733	0.103325	0.118535	0.0804742	0.267381	0.553069	0.735343	0.57706	0.671657	0.212288	0.0160156
EU	AES	OECD	Payments for nitrate reduction Sugar RDR expenditures	NA	M.EUR	0.054376	0.0887603	0.0682859	0.0351868	0.0273733	0.103325	0.118535	0.0804742	0.267381	0.553069	0.735343	0.57706	0.671657	0.212288	0.0160156
EU	AES	OECD	Payments for nitrate reduction other commodities RDR expenditures	NA	M.EUR	0.978774	1.59769	1.22915	0.633362	0.492719	4.66638	12.4638	10.3659	10.4497	16.7655	13.2362	20.5017	20.8044	13.0105	10.1579
EU	AES	OECD	Payments for nitrate reduction Maize national expenditures	NA	M.EUR	0.049827	0.095	0.0985	0.045	0.033	0.133	0.133	0.0805	0.4075	0.6185	0.7	0.49	0.65	0.2245	0.017
EU	AES	OECD	Payments for nitrate reduction Sugar national expenditures	NA	M.EUR	0.049827	0.095	0.0985	0.045	0.033	0.133	0.133	0.0805	0.4075	0.6185	0.7	0.49	0.65	0.2245	0.017
EU	AES	OECD	Payments for nitrate reduction other commodities national expenditures	NA	M.EUR	0.896892	1.71	1.773	0.81	0.594	6.00654	13.9848	10.3692	15.9258	18.7489	12.6	17.4087	20.1336	13.7589	10.7823
EU	AES	OECD	Payments for integrated production of wine RDR expenditures	NA	M.EUR	12.6425	9.7196	5.91255	6.81938	7.26087	7.15572	8.57069	9.51674	5.5829	9.60733	11.1156	12.1093	10.927	9.31583	9.07962
EU	AES	OECD	Payments for integrated production of wine national expenditures	NA	M.EUR	11.5848	10.4029	8.52864	8.72123	8.75338	9.2108	9.61661	9.51979	8.50857	10.7439	10.5813	10.2824	10.5746	9.85175	9.63769
EU	AES	OECD	Payments for fruits and vegetables (integrated production system) national expenditures	NA	M.EUR	3.68769	3.10315	2.02435	2.1286	2.16688	3.95607	3.2386	3.49385	19.6862	27.9807	28.2059	23.8602	24.5396	24.361	9.72228
EU	AES	OECD	Extensive management of grassland RDR expenditures	NA	M.EUR	185	173.915	132.704	187.05	231.135	234.733	237.732	310.247	150.91	223.751	229.268	211.098	197.79	158.328	166.722
EU	AES	OECD	Extensive management of grassland national expenditures	NA	M.EUR	169.523	186.141	191.421	239.216	278.645	302.146	266.744	310.347	229.993	250.222	218.249	179.25	191.412	167.436	176.969
EU	AES	OECD	Extensive management of grassland Article 68	NA	M.EUR	0	0	0	0	0	0	0	0	0	0	0	10.3063	8.54053	12.7332	9.40467
EU	AES	OECD	Restoration of permanent pastures RDR expenditures	NA	M.EUR	0	0	0	0	0	1.02594	0.995556	1.5752	1.80309	1.43364	1.63245	3.54053	2.93085	1.12561	0.938961
EU	AES	OECD	Restoration of permanent pastures national expenditures	NA	M.EUR	0	0	0	0	0	0	0	0	0	3.58101	52.2708	47.7832	134.73	224.84	224.376
EU	AES	OECD	Conversion of arable land into pastures RDR expenditures	NA	M.EUR	1.5687	1.47676	1.98368	4.46287	6.03615	4.61041	5.68267	6.44006	2.60805	6.09412	5.97438	3.7024	6.69365	4.5109	4.47925
EU	AES	OECD	Conversion of arable land into pastures national expenditures	NA	M.EUR	1.43747	1.58058	2.86139	5.70752	7.27691	5.93449	6.37615	6.44212	3.97477	6.81508	5.68723	3.14383	6.47782	4.7704	4.75456
EU	AES	OECD	Payments to organic crop farming RDR expenditures	NA	M.EUR	25.5399	27.1613	8.53432	23.3092	24.2044	4.18594	15.6333	20.7125	15.2754	16.6857	42.5369	19.0513	20.2025	17.105	29.6368
EU	AES	OECD	Payments to organic crop farming national expenditures	NA	M.EUR	23.4032	29.0707	12.3104	29.8099	29.1797	5.38812	17.5411	20.7191	23.2804	18.6597	40.4924	16.1771	19.5511	18.089	31.4584
EU	AES	OECD	Extensive management of arable land RDR expenditures	NA	M.EUR	71.2744	62.0138	30.2394	53.7226	57.1768	64.6985	73.4911	79.6963	8.06669	4.86044	28.3824	35.971	44.8491	82.5581	82.0977
EU	AES	OECD	Extensive management of arable land national expenditures	NA	M.EUR	65.3117	66.3733	43.6192	68.7053	68.9298	83.2796	82.4595	79.7219	12.294	5.43545	27.0182	30.5442	43.403	87.3074	87.1438
EU	AES	OECD	Winter cover on arable land RDR expenditures	NA	M.EUR	81.9796	94.9934	42.5446	65.0621	51.8998	40.2569	47.1891	51.8317	37.7157	33.4467	38.1592	42.8986	37.24	32.807	32.9187
EU	AES	OECD	Winter cover on arable land national expenditures	NA	M.EUR	75.1214	101.671	61.3691	83.2072	62.5681	51.8185	52.9477	51.8483	57.4802	37.4036	36.3252	36.4266	36.0392	34.6943	34.9421
EU	AES	OECD	Winter cover on arable land Article 68	NA	M.EUR	0	0	0	0	0	0	0	0	0	0	0	0	0	4.75481	0
EU	AES	OECD	Crop rotation RDR expenditures	NA	M.EUR	4.60555	4.63379	5.6625	13.1407	20.21	19.5544	26.1077	26.8168	14.4704	18.6126	22.9305	9.71683	61.7987	39.8716	41.7502
EU	AES	OECD	Crop rotation national expenditures	NA	M.EUR	4.22026	4.95954	8.16795	16.8055	24.3642	25.1704	29.2937	26.8254	22.0535	20.8145	21.8284	8.25087	59.8061	42.1653	44.3164
EU	AES	OECD	Crop rotation Art. 68	NA	M.EUR	0	0	0	0	0	0	0	0	0	0	0	250.48	135.326	178.709	210.856
EU	AES	OECD	Sustainable animal breeding RDR expenditures	NA	M.EUR	0	0	0	0	0	1.02594	0.995556	1.5752	1.80309	1.43364	1.63245	3.54053	2.93085	1.12561	0.938961
EU	AES	OECD	Sustainable animal breeding national expenditures	NA	M.EUR	0	0	0	0	0	1.32059	1.11705	1.5757	2.74798	1.60325	1.55399	3.00638	2.83635	1.19036	0.996674
EU	AES	OECD	Other agri-environmental payments to groups RDR expenditures	NA	M.EUR	9.72323	8.32741	6.75109	7.47709	7.9486	8.36049	36.3037	43.486	34.8557	40.9141	38.3155	49.7818	75.2516	64.8662	44.2752
EU	AES	OECD	Other agri-environmental payments to groups national expenditures	NA	M.EUR	8.9098	8.91282	9.73821	9.56237	9.58247	10.7616	40.734	43.5	53.1215	45.7544	36.474	42.2713	72.8253	68.5978	46.9966
EU	AES	OECD	Extensive management of all land RDR expenditures	NA	M.EUR	158.063	70.3812	46.8267	57.8136	58.9396	60.4014	68.8853	75.7294	116.04	173.125	157.896	180.807	335.026	420.638	427.703
EU	AES	OECD	Extensive management of all land national expenditures	NA	M.EUR	144.84	75.3289	67.5458	73.9372	71.0549	77.7484	77.2916	75.7537	176.85	193.607	150.307	153.529	324.223	444.837	453.991
EU	AES	OECD	Organic farming RDR expenditures	NA	M.EUR	87.1538	90.8933	60.8398	80.889	83.8206	105.069	120.469	122.608	146.064	145.355	129.012	202.572	160.241	143.979	106.582
EU	AES	OECD	Organic farming national expenditures	NA	M.EUR	79.8627	97.283	87.7592	103.448	101.05	135.244	135.17	122.648	222.608	162.551	122.811	172.01	155.075	152.261	113.133
EU	AES	OECD	Organic farming Article 68	NA	M.EUR	0	0	0	0	0	0	0	0	0	0	0	51.4308	69.9091	116.609	122.506
EU	AES	OECD	Maintenance of protected/environmentally sensitive areas RDR expenditures	NA	M.EUR	85.9613	78.023	58.8912	68.4727	77.6712	73.7151	85.6317	85.1658	57.9915	95.9307	85.9743	107.122	119.237	94.6041	123.361
EU	AES	OECD	Maintenance of protected/environmentally sensitive areas national expenditures	NA	M.EUR	78.7699	83.5079	84.9484	87.569	93.6369	94.8857	96.0817	85.1931	77.2275	93.8204	62.3327	71.393	86.5564	58.1747	88.9158
EU	AES	OECD	Maintenance of protected/environmentally sensitive areas article 68	NA	M.EUR	0	0	0	0	0	0	0	0	0	0	0	0.968601	0.802648	1.1887	0
EU	AES	OECD	Environmentally friendly production RDR expenditures	NA	M.EUR	857.818	1381.44	1541.09	1253.6	1209.22	1171.73	1254.27	1413.51	906.852	1270.92	1343.24	1560.83	1392.94	1288.5	1284.06
EU	AES	OECD	Environmentally friendly production national expenditures	NA	M.EUR	786.055	1478.55	2222.97	1603.22	1457.78	1508.24	1407.33	1413.96	1382.08	1421.28	1278.68	1325.35	1348.03	1362.62	1362.99
EU	AES	OECD	Environmentally friendly production Article 68	NA	M.EUR	0	0	0	0	0	0	0	0	0	0	0	11.1389	9.23045	33.3312	41.3585
EU	AES	OECD	Integrated farming RDR expenditures	NA	M.EUR	2.65027	3.61301	2.74618	2.38742	2.32159	2.24512	11.14	18.0291	12.5121	9.49849	22.6521	6.70854	8.58838	8.09372	14.0592
EU	AES	OECD	Integrated farming national expenditures	NA	M.EUR	2.42855	3.867	3.96127	3.05324	2.79881	2.8899	12.4994	18.0349	19.069	10.6222	21.5633	5.69643	8.31146	8.55933	14.9233
EU	AES	OECD	Other agri-environmental payments to all land RDR expenditures	NA	M.EUR	283.438	174.803	22.6963	27.7489	32.2411	29.4607	37.3765	62.8585	24.2426	30.1904	38.8831	34.4958	33.7131	125.596	143.768
EU	AES	OECD	Other agri-environmental payments to all land national expenditures	NA	M.EUR	259.727	187.091	32.7385	35.4878	38.8684	37.9217	41.9377	62.8786	36.9468	33.7621	37.0143	29.2915	32.6261	132.821	152.604
EU	AES	OECD	Long-term set-aside national expenditures	NA	M.EUR	0.996547	1	0.59	2.796	3.917	5.18899	5.90456	1.75385	5.91325	0.988346	1.34645	2.29155	2.62595	2.99895	3.4203
EU	AES	OECD	Afforestation RDR expenditures	NA	M.EUR	392.235	533	493.213	421.473	374.73	414.309	403.81	433.302	129.024	193.63	182.079	179.943	192.536	201.87	201.87
EU	AES	OECD	Afforestation national expenditures	NA	M.EUR	174.644	296.243	261.691	259.258	236.679	218.116	302.707	199.636	203.28	249.603	208.034	242.045	223.101	240.801	231.856
EU	AES	OECD	Other national expenditures for long term resource retirement	NA	M.EUR	4.19333	0	0.023	0	0	6.17574	7.20096	1.69681	6.54631	5.34711	0.367944	0.506303	0.368635	0.161472	0.15095
EU	AES	OECD	Preservation of biodiversity RDR expenditures	NA	M.EUR	4.0525	3.66925	5.14205	5.89214	7.09818	6.78512	9.16727	16.8414	35.1197	83.3554	140.431	209.941	333.56	511.092	498.025
EU	AES	OECD	Preservation of biodiversity national expenditures	NA	M.EUR	3.71348	3.9272	7.41722	7.53539	8.55724	8.73377	10.286	16.8468	53.5239	93.2168	133.681	178.268	322.805	540.494	528.636
EU	AES	OECD	Green set-aside/fallows RDR expenditures	NA	M.EUR	0.431009	0.405749	0.545027	1.50144	1.72565	1.29825	1.39218	1.29468	0.405013	0.473906	0.616375	0.441367	0.730724	0.392269	0.533268
EU	AES	OECD	Green set-aside/fallows national expenditures	NA	M.EUR	0.394952	0.434272	0.786182	1.92017	2.08037	1.6711	1.56207	1.29509	0.617257	0.529971	0.58675	0.374779	0.707163	0.414835	0.566045
EU	AES	OECD	Landscape payments RDR expenditures	NA	M.EUR	47.3951	40.6616	36.7753	46.8296	66.1541	65.7037	109.445	109.412	116.687	62.1551	104.214	71.6165	124.525	114.41	114.318
EU	AES	OECD	Landscape payments national expenditures	NA	M.EUR	43.4301	43.52	53.0471	59.8899	79.7524	84.5735	122.801	109.447	177.835	69.5083	99.2055	60.8119	120.509	120.991	121.345
EU	AES	OECD	Conversion of ag land to wetlands and ponds RDR expenditures	NA	M.EUR	2.72587	2.61385	3.6841	7.79309	10.2017	8.50321	9.05571	7.87477	3.02087	3.68911	4.54445	4.04989	5.56992	3.69322	4.66706
EU	AES	OECD	Conversion of ag land to wetlands and ponds national expenditures	NA	M.EUR	2.49783	2.7976	5.31418	9.96649	12.2987	10.9453	10.1608	7.87729	4.60393	4.12555	4.32603	3.43889	5.39032	3.90569	4.95392
EU	AES	OECD	Amenities (Terraces stone walls hedges shelter belts buffer strips etc.) RDR expenditures	NA	M.EUR	28.4682	27.984	22.4711	46.3163	55.1874	56.9164	57.4323	78.9714	47.8144	152.053	117.418	155.699	174.878	222.433	218.637
EU	AES	OECD	Amenities (Terraces stone walls hedges shelter belts buffer strips etc.) national expenditures	NA	M.EUR	26.0866	29.9512	32.4138	59.2334	66.5314	73.2624	64.441	78.9967	68.2205	164.709	97.2701	102.853	102.217	138.247	134.732
EU	VOP	OECD	NA	NA	M.EUR	234927	241703	249966	242638	243283	278451	271481	279199	326343	344323	302616	326267	358731	371000	375037
EU	PSE	OECD	NA	NA	M.EUR	105591	93940.5	90115.3	98403.7	98536.7	110798	101133	99573.7	89933	94344.6	86160.1	78975.7	77907.5	86321.2	87576.2
EU	AES	WTO	Green box: (h) Structural Adjustment Assistance provided through Resource Retirement Programmes	NA	M.EUR	NA	NA	NA	NA	NA	NA	NA	NA	NA	NA	NA	NA	330.7	NA	NA
EU	AES	WTO	Green box: (j) Environmental Programmes	NA	M.EUR	NA	NA	NA	NA	NA	NA	NA	NA	NA	NA	NA	NA	8302	NA	NA
EU	PS	WTO	NA	DS:4	M.EUR	NA	NA	NA	NA	NA	NA	NA	NA	NA	NA	NA	NA	7861.7	NA	NA
EU	PS	WTO	NA	DS:3	M.EUR	NA	NA	NA	NA	NA	NA	NA	NA	NA	NA	NA	NA	2981.1	NA	NA
EU	PS	WTO	NA	Green box: (d) Decoupled Income Support	M.EUR	NA	NA	NA	NA	NA	NA	NA	NA	NA	NA	NA	NA	32756	NA	NA
EU	PS	WTO	NA	Green box: (i) Structural Adjustment Assistance provided through Investment Aids	M.EUR	NA	NA	NA	NA	NA	NA	NA	NA	NA	NA	NA	NA	7338.5	NA	NA
EU	PS	WTO	NA	Green box: (l) Other	M.EUR	NA	NA	NA	NA	NA	NA	NA	NA	NA	NA	NA	NA	5967.9	NA	NA
EU	PS	WTO	NA	Green box: (f) Payments for Relief from Natural Disasters	M.EUR	NA	NA	NA	NA	NA	NA	NA	NA	NA	NA	NA	NA	840.8	NA	NA
EU	PS	WTO	NA	Green box: (g) Structural Adjustment Assistance provided through Producer Retirement Programmes	M.EUR	NA	NA	NA	NA	NA	NA	NA	NA	NA	NA	NA	NA	742.9	NA	NA
EU	PS	WTO	NA	Green box: (k) Regional Assistance Programmes	M.EUR	NA	NA	NA	NA	NA	NA	NA	NA	NA	NA	NA	NA	4511.2	NA	NA
EU	PS	WTO	NA	Green box: (a) General services, (vii) Infrastructural services	M.EUR	NA	NA	NA	NA	NA	NA	NA	NA	NA	NA	NA	NA	2691.8	NA	NA
EU	VOP	WTO	NA	NA	M.EUR	NA	NA	NA	NA	NA	NA	NA	NA	NA	NA	NA	NA	370676	NA	NA
Iceland	XERATE	Oanda	NA	NA	M.ISK	NA	NA	NA	NA	NA	NA	NA	NA	NA	NA	NA	NA	NA	NA	8192.92
Iceland	AES	OECD	Organic farming	NA	M.ISK	0	0	0	0	0	0	0	0	0	0	4.5	2.5	4.5	5.7	0
Iceland	AES	OECD	Grants to farmers participating in soil conservation and forestry programs	NA	M.ISK	0	0	0	0	0	0	0	0	0	40	33	44.9	0	0	0
Iceland	AES	OECD	Cost of constructing barriers blockades and dams for soil conservation purposes	NA	M.ISK	0	0	0	0	0	0	0	0	0	67.8	0	0	0	0	0
Iceland	VOP	OECD	NA	NA	M.ISK	13476.4	12070.7	13126.7	14864.1	13103.7	13566.3	16424.4	17641.6	18464	22966	23981.4	24933	27008.4	28978.1	32505.8
Iceland	PSE	OECD	NA	NA	M.ISK	13481.5	12113.4	12357.5	14357.2	12928.3	13589.3	16030.9	16492.9	14713.9	16364.9	16152.1	15205	16248.4	18597	17865.8
India	XERATE	Oanda	NA	NA	M.USD	NA	NA	NA	NA	NA	NA	NA	NA	NA	NA	NA	NA	1000000	NA	NA
India	AES	WTO	NA	Integrated watershed management	M.USD	NA	NA	NA	NA	NA	NA	NA	NA	NA	NA	NA	NA	538.94	NA	NA
India	PS	WTO	NA	DS:4	M.USD	NA	NA	NA	NA	NA	NA	NA	NA	NA	NA	NA	NA	2120.19	NA	NA
India	PS	WTO	NA	Green box: (i) Structural adjustment assistance provided through investment aids	M.USD	NA	NA	NA	NA	NA	NA	NA	NA	NA	NA	NA	NA	3278.91	NA	NA
India	PS	WTO	NA	Green box: (f) Payments for relief from natural disasters	M.USD	NA	NA	NA	NA	NA	NA	NA	NA	NA	NA	NA	NA	693.26	NA	NA
India	PS	WTO	NA	DS:2 (Other input subsidies)	M.USD	NA	NA	NA	NA	NA	NA	NA	NA	NA	NA	NA	NA	29064	NA	NA
India	VOP	WTO	NA	NA	M.USD	NA	NA	NA	NA	NA	NA	NA	NA	NA	NA	NA	NA	53667.3	NA	NA
Indonesia	XERATE	Oanda	NA	NA	M.IDR	NA	NA	NA	NA	NA	NA	NA	NA	NA	NA	NA	NA	NA	106.782	NA
Indonesia	AES	OECD	Land conservation	NA	M.IDR	8824.59	8597.12	8994.4	9228.24	9397.52	10071	10488	11333	10640	11031	33460.7	30536.4	39880	47477.3	NA
Indonesia	VOP	OECD	NA	NA	M.IDR	1.85447e+08	1.9925e+08	2.27469e+08	2.62446e+08	2.89451e+08	3.22804e+08	3.67791e+08	4.61976e+08	5.65407e+08	7.29327e+08	7.96932e+08	1.00343e+09	1.12075e+09	1.23519e+09	NA
Indonesia	PSE	OECD	NA	NA	M.IDR	-7.64764e+06	1.38587e+07	8.19092e+06	3.23078e+07	3.68391e+07	2.86511e+07	1.35916e+07	7.11061e+07	8.57193e+07	-7.97319e+07	4.86545e+07	2.15643e+08	1.65727e+08	2.62294e+08	NA
Israel	XERATE	Oanda	NA	NA	M.ILS	NA	NA	NA	NA	NA	NA	NA	NA	NA	NA	NA	NA	NA	NA	276969
Israel	XERATE	Oanda	NA	NA	T.USD	NA	NA	NA	NA	NA	NA	NA	NA	NA	NA	NA	1000	NA	NA	NA
Israel	AES	OECD	Reforming the dairy sector	NA	M.ILS	3.9	9.2	33.3	64.7	45.8	58.2	87.9	94.2	83	54.7	16.4	5.2	2.1	4.2	2.2
Israel	AES	OECD	Soil Conservation & Drainage Department	NA	M.ILS	7.85234	7.6891	7.36416	7.45216	10.777	6.64999	6.38223	6.92696	5.7559	9.838	9.9599	10.7843	16.485	15.014	13.725
Israel	VOP	OECD	NA	NA	M.ILS	13574.8	13694.2	13941	15801.5	16121.2	17509.7	20358.6	22419	22984.5	24979.9	25581.3	26056	28552	29310	29486
Israel	PSE	OECD	NA	NA	M.ILS	2877.51	3287.99	3070.75	2661.11	2000.9	1843.36	2206.8	1792.48	356.362	4211.21	3334.17	3434.86	3697.47	3087.13	2442.33
Israel	AES	WTO	Green box: (g) Payments under Environmental Programmes	NA	T.USD	NA	NA	NA	NA	NA	NA	NA	NA	NA	NA	NA	1406	NA	NA	NA
Israel	PS	WTO	NA	DS:4	T.USD	NA	NA	NA	NA	NA	NA	NA	NA	NA	NA	NA	561933	NA	NA	NA
Israel	PS	WTO	NA	Green box: (d) Decoupled Income Measures	T.USD	NA	NA	NA	NA	NA	NA	NA	NA	NA	NA	NA	10825	NA	NA	NA
Israel	PS	WTO	NA	Green box: (k) Regional Assistance Programmes	T.USD	NA	NA	NA	NA	NA	NA	NA	NA	NA	NA	NA	1814	NA	NA	NA
Israel	PS	WTO	NA	Green box: (f) Payment for Relief from Natural Disasters	T.USD	NA	NA	NA	NA	NA	NA	NA	NA	NA	NA	NA	36875	NA	NA	NA
Israel	VOP	WTO	NA	NA	T.USD	NA	NA	NA	NA	NA	NA	NA	NA	NA	NA	NA	7102391	NA	NA	NA
Japan	XERATE	Oanda	NA	NA	B.JPY	NA	NA	NA	NA	NA	NA	NA	NA	NA	NA	NA	NA	NA	1.25311e+07	1.02464e+07
Japan	AES	OECD	Direct payment for enviromentally friendly farming	NA	B.JPY	0	0	0	0	0	0	0	0	2.98628	2.986	3	2.565	3.205	1.498	2.47
Japan	VOP	OECD	NA	NA	B.JPY	9299.19	9129.5	8881.3	8929.7	8856.5	8713.6	8511.9	8332.2	8258.5	8466.2	8190.2	8121.4	8246.3	8525.1	8297.6
Japan	PSE	OECD	NA	NA	B.JPY	5904.24	5832.54	5370.58	5477.79	5448.69	5195.52	4887.58	4580.49	4135.74	4407.46	4331.75	4973.24	4812.97	5233.14	5265.1
Japan	AES	WTO	Green box: (j) Environmental programmes	NA	B.JPY	NA	NA	NA	NA	NA	NA	NA	NA	NA	NA	NA	NA	NA	260.8	NA
Japan	PS	WTO	NA	DS:3	B.JPY	NA	NA	NA	NA	NA	NA	NA	NA	NA	NA	NA	NA	NA	155.2	NA
Japan	PS	WTO	NA	Green box: (g) Structural adjustment assistance provided through producer retirement programmes	B.JPY	NA	NA	NA	NA	NA	NA	NA	NA	NA	NA	NA	NA	NA	127.9	NA
Japan	PS	WTO	NA	Green box: (i) Structural adjustment assistance provided through investment aids	B.JPY	NA	NA	NA	NA	NA	NA	NA	NA	NA	NA	NA	NA	NA	60.1	NA
Japan	PS	WTO	NA	Green box: (k) Regional assistance programmes	B.JPY	NA	NA	NA	NA	NA	NA	NA	NA	NA	NA	NA	NA	NA	26.1	NA
Japan	PS	WTO	NA	Green box: (f) Payments for relief from natural disasters	B.JPY	NA	NA	NA	NA	NA	NA	NA	NA	NA	NA	NA	NA	NA	39.4	NA
Japan	PS	WTO	NA	DS:4	B.JPY	NA	NA	NA	NA	NA	NA	NA	NA	NA	NA	NA	NA	NA	807	NA
Japan	PS	WTO	NA	advisory services for effective farm land utilization	B.JPY	NA	NA	NA	NA	NA	NA	NA	NA	NA	NA	NA	NA	NA	1.9	NA
Japan	VOP	WTO	NA	NA	B.JPY	NA	NA	NA	NA	NA	NA	NA	NA	NA	NA	NA	NA	NA	8718.3	NA
Jordan	XERATE	Oanda	NA	NA	JOD	NA	NA	NA	NA	NA	NA	NA	NA	NA	NA	NA	1.41145	NA	NA	NA
Jordan	AES	WTO	NA	NA	JOD	NA	NA	NA	NA	NA	NA	NA	NA	NA	NA	NA	0	NA	NA	NA
Jordan	PS	WTO	NA	DS:4	JOD	NA	NA	NA	NA	NA	NA	NA	NA	NA	NA	NA	26637043	NA	NA	NA
Jordan	PS	WTO	NA	DS:2	JOD	NA	NA	NA	NA	NA	NA	NA	NA	NA	NA	NA	874353	NA	NA	NA
Jordan	VOP	WTO	NA	NA	JOD	NA	NA	NA	NA	NA	NA	NA	NA	NA	NA	NA	560854900	NA	NA	NA
Kazakhstan	XERATE	Oanda	NA	NA	M.KZT	NA	NA	NA	NA	NA	NA	NA	NA	NA	NA	NA	NA	NA	6705.94	NA
Kazakhstan	AES	OECD	NA	NA	M.KZT	0	0	0	0	0	0	0	0	0	0	0	0	0	0	NA
Kazakhstan	VOP	OECD	NA	NA	M.KZT	334970	402047	533639	557390	615368	698833	763843	853313	1121774	1.38419e+06	1.64019e+06	1.44263e+06	2.28604e+06	1.93885e+06	NA
Kazakhstan	PSE	OECD	NA	NA	M.KZT	32556.7	51568.8	24218	83655.6	-32081.5	19473.4	116309	121040	58017.6	56068.9	234465	142471	255754	297083	NA
Korea	XERATE	Oanda	NA	NA	B.KRW	NA	NA	NA	NA	NA	NA	NA	NA	NA	909265	NA	NA	NA	NA	913496
Korea	AES	OECD	Creation of model towns of environment-friendly farming	NA	B.KRW	0.581	0.581	0.581	0.315	0.315	0.315	0	0	0	0	0	0	0	0	0
Korea	AES	OECD	Direct payment for environmentally-friendly livestock practice	NA	B.KRW	0	0	0	0	0	2.828	4.4	5.044	0	0	0	0	0	0	0
Korea	AES	OECD	Payments for set-aside	NA	B.KRW	0	0	0	0	80.491	76.657	72.415	0	0	0	0	0	0	0	0
Korea	AES	OECD	Direct payment for environment-friendly farming practices	NA	B.KRW	5.731	5.731	5.724	3.003	2.988	4.507	8.19	14.106	17.546	26.305	42.309	40.324	33.528	36.368	27.349
Korea	AES	OECD	Paddy-field environmental conservation payment	NA	B.KRW	0	0	200.096	392.378	475.927	481.032	0	0	0	0	0	0	0	0	0
Korea	AES	OECD	Fruit acreage reduction programmes	NA	B.KRW	0.42	0.45	1.8	1.8	2.7	15.5	4.736	0	0	0	0	0	0	0	0
Korea	VOP	OECD	NA	NA	B.KRW	31857.5	31968.1	32383.1	32163.7	31808.7	36155.5	35088.9	35232.4	34685	38469.8	41364.3	41677.4	41307.7	44480.5	44526.5
Korea	PSE	OECD	NA	NA	B.KRW	21377.3	21775.3	19357.1	20073.8	18982.4	23049.4	22510	21948.2	20964.5	18525.4	21823.3	19610	23243.4	23062.6	24235.6
Korea	PS	WTO	NA	DS:4	B.KRW	NA	NA	NA	NA	NA	NA	NA	NA	NA	879.25	NA	NA	NA	NA	NA
Korea	PS	WTO	NA	DS:2	B.KRW	NA	NA	NA	NA	NA	NA	NA	NA	NA	4.63	NA	NA	NA	NA	NA
Korea	PS	WTO	NA	Green box: Training for farm management; education of farmers to improve information literacy	B.KRW	NA	NA	NA	NA	NA	NA	NA	NA	NA	75.8	NA	NA	NA	NA	NA
Korea	PS	WTO	NA	Green box: (d) Decoupled income support	B.KRW	NA	NA	NA	NA	NA	NA	NA	NA	NA	907.8	NA	NA	NA	NA	NA
Korea	PS	WTO	NA	Green box: (f) Payments for relief from natural disasters	B.KRW	NA	NA	NA	NA	NA	NA	NA	NA	NA	320.1	NA	NA	NA	NA	NA
Korea	PS	WTO	NA	Green box: (g) Structural adjustment assistance provided through producer retirement programmes	B.KRW	NA	NA	NA	NA	NA	NA	NA	NA	NA	13.1	NA	NA	NA	NA	NA
Korea	PS	WTO	NA	Green box: (i) Structural adjustment assistance provided through investment aids	B.KRW	NA	NA	NA	NA	NA	NA	NA	NA	NA	810.7	NA	NA	NA	NA	NA
Korea	PS	WTO	NA	Green box: (k) Regional assistance programmes	B.KRW	NA	NA	NA	NA	NA	NA	NA	NA	NA	44.4	NA	NA	NA	NA	NA
Korea	AES	WTO	Green box: (j) Environmental programmes	NA	B.KRW	NA	NA	NA	NA	NA	NA	NA	NA	NA	306.4	NA	NA	NA	NA	NA
Korea	VOP	WTO	NA	NA	B.KRW	NA	NA	NA	NA	NA	NA	NA	NA	NA	39662.6	NA	NA	NA	NA	NA
Mexico	XERATE	Oanda	NA	NA	M.MXN	NA	NA	NA	NA	NA	NA	NA	NA	NA	NA	NA	NA	NA	NA	78374.2
Mexico	AES	OECD	ALIANZA Ferti-irrigation and irrigation techniques	NA	M.MXN	319.206	271	394.483	0	0	0	0	0	0	0	0	0	0	0	0
Mexico	AES	OECD	Programa de adqusicion de derechos de uso del agua	NA	M.MXN	0	0	0	0	460	227.9	0	140	0	0	0	0	0	0	0
Mexico	VOP	OECD	NA	NA	M.MXN	273081	280696	305838	305380	336553	377470	380768	417638	470260	528995	531707	580102	618901	696731	740559
Mexico	PSE	OECD	NA	NA	M.MXN	50341	70281.1	60614	89378	70631.9	46762	54038.1	59759.7	67049.1	72116.1	79519.3	81368.6	86593.3	91962.1	99778.7
New Zealand	XERATE	Oanda	NA	NA	M.NZD	NA	NA	NA	NA	NA	NA	NA	NA	NA	NA	NA	NA	NA	NA	819474
New Zealand	AES	OECD	NA	NA	M.NZD	0	0	0	0	0	0	0	0	0	0	0	0	0	0	0
New Zealand	VOP	OECD	NA	NA	M.NZD	10810.1	13682	15815.4	13518	13894.7	14257.5	13812.1	14646.1	19117.4	17507	19244.2	21739.9	22555.6	21583.4	25384.3
New Zealand	PSE	OECD	NA	NA	M.NZD	81.5154	44.3966	91.9875	39.3378	104.059	92.6464	182.841	129.583	132.072	99.4779	79.0468	134.957	201.99	178.905	135.741
Norway	XERATE	Oanda	NA	NA	M.NOK	NA	NA	NA	NA	NA	NA	NA	NA	NA	NA	NA	NA	NA	NA	170113
Norway	AES	OECD	Acreage and cultural landscape scheme - potato	NA	M.NOK	47.5	43.6	44	45.2	17.8	16.4	11.8	12	12.5	12.1	11.8	11.7	11.6	11.6	14.6912
Norway	AES	OECD	Acreage and cultural landscape scheme - grains	NA	M.NOK	798.4	800.9	876.9	906	309.4	349.6	383.6	431.8	461.9	460.8	452.1	453.6	433.4	433.4	440.484
Norway	AES	OECD	Acreage and cultural landscape scheme - fruit and berries	NA	M.NOK	26	29.2	24.9	24.8	22.6	23	18	17.3	19.1	24.1	22.8	26.3	28.3	28.3	19.5483
Norway	AES	OECD	Acreage and cultural landscape scheme - vegetables	NA	M.NOK	26.2	28.8	27.7	28	19.4	20.7	12.9	12.5	14	13.5	14.9	14.4	16.7	16.7	9.44526
Norway	AES	OECD	Organic farming	NA	M.NOK	37.153	35.1	27.2	63.2	96.033	80.72	66.682	67.992	74.238	84.677	105.332	115.741	122.656	122.656	114.3
Norway	AES	OECD	Changed soil cultivation	NA	M.NOK	107.4	132.9	0	130.944	218.16	204.646	164.94	0	0	0	0	0	0	0	0
Norway	AES	OECD	Regional environmental program (start 2005)	NA	M.NOK	0	0	0	0	0	0	54.034	314.277	360.328	361.676	363.863	369.842	372.633	372.633	396.178
Norway	AES	OECD	Buffer strips cultural monuments stone paths etc.	NA	M.NOK	0	0	0	0	0	0	0	13.8062	18.5592	19.0226	20.9389	34.6322	32.7336	32.7336	32.3218
Norway	AES	OECD	Waste and landscape management recreational areas	NA	M.NOK	0	0	0	0	0	0	0	3.93089	4.8853	4.94559	5.19776	5.52554	0	0	0
Norway	VOP	OECD	NA	NA	M.NOK	17463	17120	17590	17989	18815	19130	18879	19169.1	20463.2	22507.4	22981.1	23894.2	24229.6	25974.4	26802.8
Norway	PSE	OECD	NA	NA	M.NOK	20388	18939.3	18813.8	21779.6	21357.7	20002.5	19537.5	19149.3	17237.8	20450.9	21250	21895.7	21623	23370.5	21526.9
Peru	XERATE	Oanda	NA	NA	M.USD	NA	NA	NA	NA	NA	NA	NA	NA	NA	NA	NA	1000000	NA	NA	NA
Peru	AES	WTO	Natural resource management and protection measures	NA	M.USD	NA	NA	NA	NA	NA	NA	NA	NA	NA	NA	NA	3.6	NA	NA	NA
Peru	PS	WTO	NA	DS:4	M.USD	NA	NA	NA	NA	NA	NA	NA	NA	NA	NA	NA	9.9	NA	NA	NA
Peru	PS	WTO	NA	DS:2	M.USD	NA	NA	NA	NA	NA	NA	NA	NA	NA	NA	NA	39.1	NA	NA	NA
Peru	PS	WTO	NA	Agricultural funds. Market strengthening through the promotion of competitiveness and access to guarantees. Includes the Guarantee fund for rural areas and agricultural insurance - FOGASA.	M.USD	NA	NA	NA	NA	NA	NA	NA	NA	NA	NA	NA	14.2	NA	NA	NA
Peru	VOP	WTO	NA	NA	M.USD	NA	NA	NA	NA	NA	NA	NA	NA	NA	NA	NA	11173.7	NA	NA	NA
Russia	XERATE	Oanda	NA	NA	M.RUB	NA	NA	NA	NA	NA	NA	NA	NA	NA	NA	NA	NA	NA	32181.9	NA
Russia	XERATE	Oanda	NA	NA	M.USD	NA	NA	NA	NA	NA	NA	NA	NA	NA	NA	NA	NA	NA	1000000	NA
Russia	AES	OECD	NA	NA	M.RUB	0	0	0	0	0	0	0	0	0	0	0	0	0	0	NA
Russia	VOP	OECD	NA	NA	M.RUB	523130	659860	818090	885384	966425	1.12783e+06	1.18063e+06	1.36494e+06	1.68138e+06	2.28472e+06	2.23947e+06	2.10405e+06	2.89556e+06	2.83242e+06	NA
Russia	PSE	OECD	NA	NA	M.RUB	-22955.7	7586.1	69162.1	69513.6	151075	255953	179692	207191	266163	494645	495347	485183	462070	411299	NA
Russia	AES	WTO	NA	NA	M.USD	NA	NA	NA	NA	NA	NA	NA	NA	NA	NA	NA	NA	NA	0	NA
Russia	PS	WTO	NA	DS:4	M.USD	NA	NA	NA	NA	NA	NA	NA	NA	NA	NA	NA	NA	NA	6901.97	NA
Russia	PS	WTO	NA	Green box: (i) Structural adjustment assistance provided through investment aids	M.USD	NA	NA	NA	NA	NA	NA	NA	NA	NA	NA	NA	NA	NA	94.12	NA
Russia	PS	WTO	NA	Green box: (k) Payments under regional assistance programmes	M.USD	NA	NA	NA	NA	NA	NA	NA	NA	NA	NA	NA	NA	NA	139.49	NA
Russia	PS	WTO	NA	Green box: (f) Payments (made either directly or by way of government financial participation in crop insurance schemes) for relief from natural disasters	M.USD	NA	NA	NA	NA	NA	NA	NA	NA	NA	NA	NA	NA	NA	12.93	NA
Russia	VOP	WTO	NA	NA	M.USD	NA	NA	NA	NA	NA	NA	NA	NA	NA	NA	NA	NA	NA	107515	NA
Saudi Arabia	XERATE	Oanda	NA	NA	M.SRI	NA	NA	NA	NA	NA	NA	NA	NA	NA	NA	NA	NA	266646	NA	NA
Saudi Arabia	AES	WTO	NA	NA	M.SRI	NA	NA	NA	NA	NA	NA	NA	NA	NA	NA	NA	NA	0	NA	NA
Saudi Arabia	PS	WTO	NA	DS:4	M.SRI	NA	NA	NA	NA	NA	NA	NA	NA	NA	NA	NA	NA	2342.4	NA	NA
Saudi Arabia	VOP	WTO	NA	NA	M.SRI	NA	NA	NA	NA	NA	NA	NA	NA	NA	NA	NA	NA	48163	NA	NA
South Africa	XERATE	Oanda	NA	NA	M.ZAR	NA	NA	NA	NA	NA	NA	NA	NA	NA	NA	NA	NA	NA	121796	NA
South Africa	AES	OECD	NA	NA	M.ZAR	0	0	0	0	0	0	0	0	0	0	0	0	0	0	NA
South Africa	VOP	OECD	NA	NA	M.ZAR	45161.1	49561.8	55128.2	72846.2	72035.8	74521.7	75312	84872.4	101363	121369	132152	133583	146784	162248	NA
South Africa	PSE	OECD	NA	NA	M.ZAR	3630.15	2889.04	2063.86	7400.85	5174.16	5940.03	4807.02	7742.51	5270.87	4431.98	5454.8	2303.37	3949.32	5224.6	NA
Switzerland	XERATE	Oanda	NA	NA	M.CHF	NA	NA	NA	NA	NA	NA	NA	NA	NA	NA	NA	NA	NA	NA	1.07876e+06
Switzerland	AES	OECD	Payments for Less Intensively Used Meadows for Forage Production (from 1993)	NA	M.CHF	18.5	18.3	17.6	16.7	15.9	15.1	14.4	15	13	8.2	7.8	7.3	6.9	6.5	7
Switzerland	AES	OECD	Payments for Litter (from 1999)	NA	M.CHF	4.5	3.7	4.6	6.1	6.3	6.4	6.5	6.5	6.5	6.5	6.9	6.9	7	6.9	6.9
Switzerland	AES	OECD	Payments for Extensive Farming Bread Wheat (1992-98)	NA	M.CHF	0	0	0	0	0	0	0	0	0	0	0	0	0	0	0
Switzerland	AES	OECD	Payments for Extensive Farming Rapeseed (1997-98)	NA	M.CHF	0	0	0	0	0	0	0	0	0	0	0	0	0	0	0
Switzerland	AES	OECD	Payments for Extensive Farming Feed grains (1992-1998)	NA	M.CHF	0	0	0	0	0	0	0	0	0	0	0	0	0	0	0
Switzerland	AES	OECD	Payment for Extensive Cultivation Grains Rapeseed (from 1999)	NA	M.CHF	35.1	33.4	32.5	31.9	31.3	30.8	31.5	31	31	29	29.1	29.3	30	29.7	30
Switzerland	AES	OECD	Payments for Integrated Production of Crops (1992-98)	NA	M.CHF	0	0	0	0	0	0	0	0	0	0	0	0	0	0	0
Switzerland	AES	OECD	Payments for Green Fallow (1993-1998)	NA	M.CHF	0	0	0	0	0	0	0	0	0	0	0	0	0	0	0
Switzerland	AES	OECD	Payments for Extensive Farming on Dryland and Litter Areas (from 1988)	NA	M.CHF	11	11	11	11	11	11	11	11	11	11	11	11	11	11	11
Switzerland	AES	OECD	Payments for Extensive Meadows on assolated and set-asside land (1993-2000)	NA	M.CHF	18.5	18.1	0	0	0	0	0	0	0	0	0	0	0	0	0
Switzerland	AES	OECD	Payments for Rotation of Fallow Land (from 1999)	NA	M.CHF	0.8	2.6	3.2	3.3	3.3	2.7	2.2	2.2	2.2	2.1	1.4	1.2	1.3	1.3	1.3
Switzerland	AES	OECD	Payments for Measures to Protect Water Quality (from 2000)	NA	M.CHF	0.2	1.1	2.3	3.6	4	5.5	6.2	6.2	4.7	6.2	6.8	8.1	6.7	7.2	7.5
Switzerland	AES	OECD	Payments for Ecological Compensation and Extensive Meadows (1992)	NA	M.CHF	0	0	0	0	0	0	0	0	0	0	0	0	0	0	0
Switzerland	AES	OECD	Payments for Organic Farming of Crops (from 1993)	NA	M.CHF	11.6	12.2	23.5	25.5	27.1	28	28.6	28.5	32.1	28	27.9	29.7	29.7	33.1	33
Switzerland	AES	OECD	Extensive Area Strips (from 1999)	NA	M.CHF	0.1	0.2	0.1	0.1	0.05	0.1	0.1	0.1	0.1	0.1	0.1	0.1	0.2	0.3	0.3
Switzerland	AES	OECD	Payments for Extensive Meadows (from 1993)	NA	M.CHF	34.9	39.8	47.7	50.2	53	55.3	57.4	57.6	62.1	63.3	65.4	68.3	72.1	75.3	75
Switzerland	AES	OECD	Tall Fruit Tree Payments (from 1993)	NA	M.CHF	36.9	37.1	36.6	36.3	36.2	35.8	35.4	35	35	33.6	33.3	33.2	33.5	33.6	33.5
Switzerland	AES	OECD	Payments for Hedges and Rustic Groves (from 1999)	NA	M.CHF	2.8	2.8	2.8	2.9	2.9	3	3	3	3	3	3.3	6.8	7.2	7.6	7.5
Switzerland	AES	OECD	Ecological contributions (Contribution à la qualité écologique) (from 2001)	NA	M.CHF	0	0	4.7	8.9	14.6	23	27.5	30	32.1	43.1	54.9	62	71.5	83.2	84
Switzerland	AES	OECD	Payments for Floral Fallow (from 1994)	NA	M.CHF	2.2	4	5.9	6.9	7.3	7.3	7	7	6.4	6.5	4.9	4.9	5.2	5.3	5.5
Switzerland	VOP	OECD	NA	NA	M.CHF	7216.9	7559.2	7185.6	7254	7012.63	7283.77	7019.31	6516.27	6864.59	7438.78	6792.49	6540.55	6585.67	6403.95	6573.7
Switzerland	PSE	OECD	NA	NA	M.CHF	7690.35	7491.01	7052.32	7516.68	7173.61	7361.04	6861.19	6446.02	5408.2	6057.73	6142.42	5221	5441.72	5565.97	4983.19
Taiwan	XERATE	Oanda	NA	NA	M.NTD	NA	NA	NA	NA	NA	NA	NA	NA	NA	NA	NA	31712.4	NA	NA	NA
Taiwan	PS	WTO	NA	DS:4	M.NTD	NA	NA	NA	NA	NA	NA	NA	NA	NA	NA	NA	10391.1	NA	NA	NA
Taiwan	PS	WTO	NA	Green box: (f) Payments for relief from natural disasters	M.NTD	NA	NA	NA	NA	NA	NA	NA	NA	NA	NA	NA	5306.6	NA	NA	NA
Taiwan	AES	WTO	Green box: (h) Structural adjustment assistance provided through resource retirement programmes	NA	M.NTD	NA	NA	NA	NA	NA	NA	NA	NA	NA	NA	NA	504.83	NA	NA	NA
Taiwan	AES	WTO	Green box: (j) Environmental programmes	NA	M.NTD	NA	NA	NA	NA	NA	NA	NA	NA	NA	NA	NA	9492.56	NA	NA	NA
Taiwan	AES	WTO	Green box: (k) Regional assistance programmes	NA	M.NTD	NA	NA	NA	NA	NA	NA	NA	NA	NA	NA	NA	56.67	NA	NA	NA
Taiwan	VOP	WTO	NA	NA	M.NTD	NA	NA	NA	NA	NA	NA	NA	NA	NA	NA	NA	334992	NA	NA	NA
Tonga	XERATE	Oanda	NA	NA	TOP	NA	NA	NA	NA	NA	NA	NA	NA	NA	NA	0.500341	NA	NA	NA	NA
Tonga	AES	WTO	NA	NA	TOP	NA	NA	NA	NA	NA	NA	NA	NA	NA	NA	0	NA	NA	NA	NA
Tonga	PS	WTO	NA	NA	TOP	NA	NA	NA	NA	NA	NA	NA	NA	NA	NA	0	NA	NA	NA	NA
Tonga	VOP	WTO	NA	NA	TOP	NA	NA	NA	NA	NA	NA	NA	NA	NA	NA	4074694	NA	NA	NA	NA
Tunisia	XERATE	Oanda	NA	NA	M.TND	NA	NA	NA	NA	NA	NA	NA	NA	NA	NA	745309	NA	NA	NA	NA
Tunisia	AES	WTO	Green box: (a) General services: Environmental conservation through land and afforestation works	NA	M.TND	NA	NA	NA	NA	NA	NA	NA	NA	NA	NA	47	NA	NA	NA	NA
Tunisia	PS	WTO	NA	DS:4	M.TND	NA	NA	NA	NA	NA	NA	NA	NA	NA	NA	67.08	NA	NA	NA	NA
Tunisia	PS	WTO	NA	DS:2	M.TND	NA	NA	NA	NA	NA	NA	NA	NA	NA	NA	95	NA	NA	NA	NA
Tunisia	PS	WTO	NA	Green box: (b) Structural adjustment assistance provided through investment aids	M.TND	NA	NA	NA	NA	NA	NA	NA	NA	NA	NA	10	NA	NA	NA	NA
Tunisia	VOP	WTO	NA	NA	M.TND	NA	NA	NA	NA	NA	NA	NA	NA	NA	NA	5927	NA	NA	NA	NA
Turkey	XERATE	Oanda	NA	NA	M.TRY	NA	NA	NA	NA	NA	NA	NA	NA	NA	NA	NA	NA	NA	NA	524974
Turkey	AES	OECD	Water for the Future	NA	M.TRY	0	0	0	0	0	0	0	1.42418	2.405	4.863	3.82755	10.347	16.1284	23.1827	23.1827
Turkey	VOP	OECD	NA	NA	M.TRY	11204.7	16672.3	21360.4	33895.9	49281.1	56611.2	62734.2	68525.7	74806.4	83181.5	88428.9	116711	132413	138038	148391
Turkey	PSE	OECD	NA	NA	M.TRY	4114.68	5319.45	3189.79	8785.1	15394.8	17013.6	18050	21817.5	18158.8	22583.9	23286.8	31218.9	27688.6	27414.3	29876.2
Ukraine	XERATE	Oanda	NA	NA	M.HRV	NA	NA	NA	NA	NA	NA	NA	NA	NA	NA	NA	NA	125231	123743	NA
Ukraine	AES	OECD	Payments for fundamental soil improvement from 1992	NA	M.HRV	5.3	11.1	12.9	0	0	0	0	0	0	0	0	0	0	0	NA
Ukraine	VOP	OECD	NA	NA	M.HRV	31801.9	46747.3	55691.6	52717.5	58320.1	75147.9	91411.2	102070	125278	170838	176312	234360	302663	277377	NA
Ukraine	PSE	OECD	NA	NA	M.HRV	592.946	203.312	3500.3	-50.3246	6.93812	2153.21	10682.8	12072.8	4436.96	5534.97	14842.4	16602	-13833.5	3878.52	NA
Ukraine	PS	WTO	NA	DS:4	M.HRV	NA	NA	NA	NA	NA	NA	NA	NA	NA	NA	NA	NA	14892.2	NA	NA
Ukraine	PS	WTO	Green box: (c) Environmental programs	NA	M.HRV	NA	NA	NA	NA	NA	NA	NA	NA	NA	NA	NA	NA	16.6	NA	NA
Ukraine	VOP	WTO	NA	NA	M.HRV	NA	NA	NA	NA	NA	NA	NA	NA	NA	NA	NA	NA	253569	NA	NA
Uruguay	XERATE	Oanda	NA	NA	USD	NA	NA	NA	NA	NA	NA	NA	NA	NA	NA	NA	NA	NA	NA	1
Uruguay	AES	WTO	NA	NA	USD	NA	NA	NA	NA	NA	NA	NA	NA	NA	NA	NA	NA	NA	NA	0
Uruguay	PS	WTO	NA	DS:2	USD	NA	NA	NA	NA	NA	NA	NA	NA	NA	NA	NA	NA	NA	NA	1784842
Uruguay	PS	WTO	NA	DS:4	USD	NA	NA	NA	NA	NA	NA	NA	NA	NA	NA	NA	NA	NA	NA	41572570
Uruguay	VOP	WTO	NA	NA	USD	NA	NA	NA	NA	NA	NA	NA	NA	NA	NA	NA	NA	NA	NA	7697924250
USA	XERATE	Oanda	NA	NA	M.USD	NA	NA	NA	NA	NA	NA	NA	NA	NA	NA	NA	NA	1000000	NA	1000000
USA	AES	OECD	Conservation Security Program (CSP)	NA	M.USD	0	0	0	0	0	20.308	101.206	128.5	124.95	162.35	127.385	99.9	89.55	84.6	74.7
USA	AES	OECD	Conservation Stewardship Program (CSP)	NA	M.USD	0	0	0	0	0	0	0	0	0	0	0	175.5	260.55	333.9	345.6
USA	AES	OECD	Environmental Quality Incentives Program (EQIP)	NA	M.USD	174	174	198.011	389.884	691	903.4	950	992	812.02	882	982.7	863.16	905.07	1009.47	1029.32
USA	AES	OECD	Agricultural Water Enhancement Program (AWEP)	NA	M.USD	0	0	0	0	0	0	0	0	0	0	0	64.8	65.7	53.1	54
USA	AES	OECD	Chesapeake Bay Watershed Initiative	NA	M.USD	0	0	0	0	0	0	0	0	0	0	0	39.6	65.7	45	45
USA	AES	OECD	Agricultural Management Assistance Program (AMA)	NA	M.USD	0	0	6.723	6.885	0	10.272	8.867	0	3.4	6.7	0	0	0	0	0
USA	AES	OECD	Emergency Conservation Program (ECP)	NA	M.USD	81.572	60.6	34.9	30.3	44.9	22.3	72	58.5	181	181	181	77	35	56	90
USA	AES	OECD	Agricultural Conservation Program (ACP)	NA	M.USD	0	4.2	1.9	0.9	0.4	0	0	0	0	0	0	0	0	0	0
USA	AES	OECD	Klamath basin	NA	M.USD	0	0	0	1.798	10.636	15.05	5.41	5.566	0	0	0	0	0	0	0
USA	AES	OECD	Ground and Surface Water Program (GSWP)	NA	M.USD	0	0	0	24.943	45.03	64.999	65	70	0	0	0	0	0	0	0
USA	AES	OECD	Farmland Protection program (FPP)	NA	M.USD	0	0.24	17.5	50.677	98	91.283	111.891	74	73.08	96.18	121	0	0	0	0
USA	AES	OECD	Farm and Ranch Lands Protection Program (FRPP)	NA	M.USD	0	0	0	0	0	0	0	0	0	0	0	150	169	145	150
USA	AES	OECD	Grassland Reserve Program (GRP)	NA	M.USD	0	0	0	0	54.015	57	71	35	12.34	2.11	45.6	95	74.1	61.75	63.65
USA	AES	OECD	Conservation Security Program (CSP)	NA	M.USD	0	0	0	0	0	20.308	101.206	128.5	124.95	162.35	127.385	99.9	89.55	84.6	74.7
USA	AES	OECD	Conservation Stewardship Program (CSP)	NA	M.USD	0	0	0	0	0	0	0	0	0	0	0	175.5	260.55	333.9	345.6
USA	AES	OECD	Conservation Technical Assistance (CTA)	NA	M.USD	548.053	567.504	619.46	679.1	712.3	741.761	696	687	674	734	738	782	797	711	772
USA	AES	OECD	EQIP -- TA	NA	M.USD	36.897	33.06	37.989	76.918	165.3	213.7	240.322	264.547	261.99	318	354.31	310.84	325.93	363.53	370.68
USA	AES	OECD	Klamath Basin -- TA	NA	M.USD	0	0	0	0.428	1.725	4.123	3.201	2.552	0	0	0	0	0	0	0
USA	AES	OECD	GSWP -- TA	NA	M.USD	0	0	0	4.75	9.13	14.699	19.089	18.432	0	0	0	0	0	0	0
USA	AES	OECD	FPP -- TA	NA	M.USD	0	0	0.7	0	2.4	3.409	5.2515	5.473	0	0	0	0	0	0	0
USA	AES	OECD	GRP -- TA	NA	M.USD	0	0	0	0	16.215	13.1	17.354	0	0.65	0.7	2.4	5	3.9	3.25	3.35
USA	AES	OECD	Conservation Security Program (CSP) -- TA	NA	M.USD	0	0	0	0	0.033	6.216	30.362	41.102	11.77	31.71	28.31	22.2	19.9	18.8	16.8
USA	AES	OECD	Conservation Stewardship Program (CSP) -- TA	NA	M.USD	0	0	0	0	0	0	0	0	0	0	0	39	57.9	74.2	76.8
USA	AES	OECD	AMA -- TA	NA	M.USD	0	0	1.577	0	1.3	3.66	4.334	0	7.25	7.25	7.25	7	7	2	3
USA	AES	OECD	ECP -- TA	NA	M.USD	2.523	4.4	2.9	2.1	2.1	0.8	8	6.5	0	0	0	0	0	0	0
USA	AES	OECD	AWEP -- TA	NA	M.USD	0	0	0	0	0	0	0	0	0	0	0	7.2	7.3	5.9	6
USA	AES	OECD	Chesapeake Bay Watershed Initiative -- TA	NA	M.USD	0	0	0	0	0	0	0	0	0	0	0	4.4	7.3	5	5
USA	AES	OECD	Grassroots Source Water Protection Program (GSWPP)	NA	M.USD	0	0	0	0	0	0	0	0	0	0	0	0	0	4	4
USA	AES	OECD	Conservation Reserve Program (CRP) -- TA	NA	M.USD	50.894	55.1	32.1	0	3.8	13	89.7	94.7	80.64	62.59	102	90	142.72	144	73
USA	AES	OECD	CRP	NA	M.USD	1600.34	1663.3	1806.9	1928.6	1889.4	1970	1963.8	2060.2	1950.36	1973.41	1979.73	1793	1854.78	1824	1989
USA	AES	OECD	Wetland Reserve Program (WRP)	NA	M.USD	144.241	176.684	174.297	284.212	285.041	285.286	267	191	237.88	164.66	375.93	567	512.1	529.2	484.2
USA	AES	OECD	WRP -- TA	NA	M.USD	12.771	12.007	14.275	2.28	24.241	27.5	22.197	26.1	26.12	18.29	21.77	63	56.9	58.8	53.8
USA	AES	OECD	Wildlife Habitat Incentives Program (WHIP)	NA	M.USD	20	0	12.5	14.92	29	37.857	46	43	32.46	62.63	63.75	62.25	62.25	35.25	37.5
USA	AES	OECD	WHIP -- TA	NA	M.USD	4.532	0	2.375	2.8	7.2	9.569	11.466	13.749	10.54	20.88	21.25	20.75	20.75	11.75	12.5
USA	VOP	OECD	NA	NA	M.USD	183777	189318	197892	193151	214023	234094	234652	246198	311268	318311	284502	334931	379486	396606	389904
USA	PSE	OECD	NA	NA	M.USD	55746.3	52277.7	51040.2	40335.9	36161.8	43328.4	40721.3	30522	33193.9	30781.9	33074.3	28040.2	31038	33547.9	31021.9
USA	AES	WTO	Conservation Operations3	NA	M.USD	NA	NA	NA	NA	NA	NA	NA	NA	NA	NA	NA	NA	875	NA	NA
USA	AES	WTO	Resource Conservation and Development	NA	M.USD	NA	NA	NA	NA	NA	NA	NA	NA	NA	NA	NA	NA	27	NA	NA
USA	AES	WTO	Green box (j) environmental payments excluding Emergency Conservation Programme	NA	M.USD	NA	NA	NA	NA	NA	NA	NA	NA	NA	NA	NA	NA	4879	NA	NA
USA	AES	WTO	Conservation Reserve Programme Technical Assistance	NA	M.USD	NA	NA	NA	NA	NA	NA	NA	NA	NA	NA	NA	NA	144	NA	NA
USA	PS	WTO	NA	Green box: (d) decoupled income support	M.USD	NA	NA	NA	NA	NA	NA	NA	NA	NA	NA	NA	NA	5698	NA	NA
USA	PS	WTO	NA	Green box: (f) Payments for relief from natural disasters	M.USD	NA	NA	NA	NA	NA	NA	NA	NA	NA	NA	NA	NA	264	NA	NA
USA	PS	WTO	NA	Green box: (i) Structural adjustment through investment aids	M.USD	NA	NA	NA	NA	NA	NA	NA	NA	NA	NA	NA	NA	154	NA	NA
USA	PS	WTO	NA	DS:4	M.USD	NA	NA	NA	NA	NA	NA	NA	NA	NA	NA	NA	NA	14368.4	NA	NA
USA	PS	WTO	NA	Expenses and Refunds, Inspection and Grading of Farm Products (formerly called Miscellaneous Trust Funds)	M.USD	NA	NA	NA	NA	NA	NA	NA	NA	NA	NA	NA	NA	154	NA	NA
USA	PS	WTO	NA	Trade Adjustment Assistance for Farmers (TAA for Farmers)	M.USD	NA	NA	NA	NA	NA	NA	NA	NA	NA	NA	NA	NA	34	NA	NA
USA	PS	WTO	NA	Emergency Conservation Programme	M.USD	NA	NA	NA	NA	NA	NA	NA	NA	NA	NA	NA	NA	35	NA	NA
USA	VOP	WTO	NA	NA	M.USD	NA	NA	NA	NA	NA	NA	NA	NA	NA	NA	NA	NA	380781	NA	NA

## Sheet: Fig3
# dataset accompanying Tanentzap et al. Resolving Conflicts between Agriculture and the Natural Environment
# compiled by AJ Tanentzap (ajt65@cam.ac.uk) 7 Mar 2015, please cite paper if re-used
# data used to generate Fig. 3 in main text; all economic data derived from OECD PSE/CSE database (http://www.oecd.org/tad/agricultural-policies/producerandconsumersupportestimatesdatabase.htm)
# VOP = value of production (millions of local currency); AES = investment in agri-environmental schemes (millions of local currency)
# PS = producer support estimate, calculated as total amount of transfers to producers from consumers and taxpayers as per OECD definitions (millions of local currency)
# AgArea = FAO % of land that under agriculture x World Bank land area; # USD = annual exchange rate of local currency into USD from http://www.ukforex.co.uk/forex-tools/historical-rate-tools/yearly-average-rates
# AES_RR = investment in land retirement agri-environmental schemes (millions of local currency); AES_FI = investment in agri-environmental schemes that aim to reduce fertiliser use (millions of local currency);
# GHG_SF = total emissions of N2O from synthetic fertilizer added to agricultural soils (Gg CO2eq), data derived from FAO (http://faostat3.fao.org/home/E)
# FBI = farmland bird index (100 = year 2000), data derived from 2013 OECD Environmental Database (http://stats.oecd.org/Index.aspx?DataSetCode=TAD_ENVINDIC_2013) for all countries but EU
# EU FBI data from Eurostat (http://ec.europa.eu/eurostat/tgm/table.do?tab=table&init=1&language=en&pcode=tsdnr100&plugin=1)
Country	Metric	1999	2000	2001	2002	2003	2004	2005	2006	2007	2008	2009	2010
USA	VOP	183777	189318	197892	193151	214023	234094	234652	246198	311268	318311	284502	334931
USA	AES	2675.83	2751.09	2964.11	3501.49	4093.16	4549.6	4910.65	4946.42	4625.4	4886.81	5279.77	5614
USA	PS	55746.3	52277.7	51040.2	40335.9	36161.8	43328.4	40721.3	30522	33193.9	30781.9	33074.3	28040.2
USA	AgArea	4.13893e+06	4.14394e+06	4.14943e+06	4.13019e+06	4.13936e+06	4.11553e+06	4.11828e+06	4.09171e+06	4.12836e+06	4.14195e+06	4116339	4.10902e+06
USA	USD	1	1	1	1	1	1	1	1	1	1	1	1
USA	AES_RR	1808.24	1907.09	2027.57	2215.09	2202.48	2295.79	2342.7	2372	2295	2218.95	2479.43	2513
USA	AES_FI	NA	NA	NA	NA	NA	10.272	8.867	0	3.4	6.7	0	39.6
Swiss	VOP	7216.9	7559.2	7185.6	7254	7012.63	7283.77	7019.31	6516.27	6864.59	7438.78	6792.49	6540.55
Swiss	PS	7690.35	7491.01	7052.32	7516.68	7173.61	7361.04	6861.19	6446.02	5408.2	6057.73	6142.42	5221
Swiss	AES	177.1	184.3	192.5	203.4	212.95	224	230.8	233.1	239.2	240.6	252.8	268.8
Swiss	AgArea	15612.4	15137.7	15070.1	15252	15252	15248	15248	15232	15232	15236	15252	15236
Swiss	USD	0.67	0.59	0.59	0.64	0.74	0.81	0.8	0.8	0.83	0.93	0.92	0.96
Swiss	AES_RR	0	0	0	0	0	0	0	0	0	0	0	0
Swiss	AES_FI	NA	NA	NA	NA	NA	61.7	61.5	62	61.5	54.1	52.2	58.1
Canada	VOP	27927.7	30002.8	32761.2	32383.8	29401.5	31461	31747.7	32626.5	37144.9	42408.7	41117.6	41050.1
Canada	AES	0	0	0	0	1.84	47.35	90.45	60.61	113.69	24.6	286.78	57.02
Canada	PS	5260.2	6487.68	5604.19	7458.88	8285.67	7241.87	7705.04	7517.04	6751.54	6184.19	7646.25	7282.4
Canada	AgArea	677466	676557	674738	674738	675648	675648	675648	659279	652914	646549	639274	632908
Canada	USD	0.67	0.67	0.65	0.64	0.72	0.77	0.83	0.88	0.94	0.94	0.88	0.97
Canada	AES_RR	0	0	0	0	0	38.7	71.37	4.72	0	0	284.88	57.02
Canada	AES_FI	NA	NA	NA	NA	NA	0	0	0	0	0	0	0
Norway	VOP	17463	17120	17590	17989	18815	19130	18879	19169.1	20463.2	22423	22868	23999
Norway	PS	20388	18911.4	18822	21786.8	21387.3	20049.7	19552.1	19196.3	17362.3	20398.8	21437	22144.6
Norway	AES	1042.65	1070.5	1000.7	1198.14	683.39	695.07	711.96	873.61	965.51	980.82	996.94	1031.74
Norway	AgArea	12455.6	12492.2	12565.2	10467.2	10406.4	10406.4	10345.5	10345.5	10315.1	10233.2	10141.6	10070.7
Norway	USD	0.13	0.11	0.11	0.13	0.14	0.15	0.16	0.16	0.17	0.18	0.16	0.17
Norway	AES_RR	0	0	0	0	0	0	0	0	0	0	0	0
Norway	AES_FI	NA	NA	NA	NA	NA	80.72	66.682	67.992	74.238	84.677	105.332	115.741
EU	VOP	234926	241703	249966	242638	243283	278451	271481	279199	326343	344323	302616	326267
EU	PS	105591	93940.5	90115.3	98403.7	98536.7	110798	101133	99573.7	89933	94344.6	86160.1	78975.7
EU	AES	4144.82	5449.65	5664.63	4999.75	4858.45	5004.71	5245.18	5584.96	4666.45	5866.54	5433.06	5994.44
EU	AgArea	2.01591e+06	2.01612e+06	1.99466e+06	1.97592e+06	1.92172e+06	1.95008e+06	1.90509e+06	1.94158e+06	1.8907e+06	1.92774e+06	1.91373e+06	1.8989e+06
EU	USD	0.94	1.09	1.12	1.06	0.88	0.8	0.8	0.8	0.73	0.68	0.72	0.75
EU	AES_RR	393.23	534	493.8	424.27	378.65	419.5	409.71	435.06	134.94	194.62	183.43	182.23
EU	AES_FI	NA	NA	NA	NA	NA	3625.86	3637.8	3915.22	3125.15	3557.59	3488.4	3865.78
Australia	VOP	30775.5	34779.3	39906.4	33235.1	37370.7	36537.3	38696	36663	43752	41964	39697	46981.1
Australia	PS	1211.24	1346.75	1447.36	1714.49	1422.82	1284.84	1461.79	1694.82	2223.31	1943.99	1267.57	1410.02
Australia	AES	144	129.32	127.3	68.24	11.66	58.3239	89.37	67.745	222.458	149.358	94.61	178.356
Australia	AgArea	4.53717e+06	4.55484e+06	4.55714e+06	4.47033e+06	4.39504e+06	4.40119e+06	4.45112e+06	4.34895e+06	4.25446e+06	4.17303e+06	4.09006e+06	3.98558e+06
Australia	USD	0.645484	0.581223	0.517943	0.54305	0.654801	0.736399	0.762474	0.753457	0.838635	0.853159	0.792116	0.919691
Australia	AES_RR	0	0	0	0	0	0	0	0	0	0	0	0
Australia	AES_FI	NA	NA	NA	NA	NA	0	0	0	0	0	0	0
USA	GHG_SF	NA	NA	NA	NA	NA	73573.9	71089.5	75037.8	74777.7	71545.1	68581.3	72733.7
Swiss	GHG_SF	NA	NA	NA	NA	NA	296.04	343.87	343.2	313.61	341.42	329.54	328.3
Canada	GHG_SF	NA	NA	NA	NA	NA	9936.6	11467.9	8855.52	13348.4	12323.5	12357.7	12806.5
Norway	GHG_SF	NA	NA	NA	NA	NA	667.31	681.28	665.13	686.25	695.18	598.62	551.55
EU	GHG_SF	NA	NA	NA	NA	NA	72427.7	69321.7	68600.9	72292.9	66725.1	63254.3	68270.3
Australia	GHG_SF	NA	NA	NA	NA	NA	6817.39	6146.76	5538.08	5478.7	5389.63	5485.16	6337.17
USA	FBI	101	100	92	90	95	94	101	101	107	NA	NA	NA
Swiss	FBI	91	100	91	97	95	90	100	88	89	89	NA	NA
Canada	FBI	102	100	91	93	95	94	95	96	95	92	92	89
Norway	FBI	96	100	89	90	89	81	77	74	83	74	64	65
EU	FBI	104	100	104	92	95	99	96	93	93	93	90	88
